# Supplementary material for: Analysis on the hotspot characteristics of bird diversity distribution along the continental coastline of China
Source: Frontiers journal article supplement (doi:10.3389/fmars.2022.1007442), 2022-09-08
Supplement: Table_1.XLSX [file Table_1.XLSX]

## Sheet: Sheet1
Species	Training AUC	Bio1	Bio2	Bio3	Bio5	Bio8	Bio12	Bio13	Bio14	Bio20	Bio21	Bio22	Bio24	Bio23	Bio25	Bio26	Maximum training sensitivity plus specificity Cloglog threshold
Abroscopus albogularis	0.9511	0.0226	6.6649	1.3664	0.2205	2.7784	0.4363	8.8213	56.3633	1.7046	0.4271	8.7644	0.0432	0.551	9.637	2.1991	0.4204
Accipiter gentilis	0.9091	2.9006	2.4723	60.3254	0	0.0081	0.0038	0.0116	2.5948	0.3154	2.8752	2.3361	0.3748	0.9163	19.4241	5.4415	0.711
Accipiter gularis	0.932	0.5755	34.2502	4.6634	3.2696	6.9972	1.9124	0.9769	9.3918	2.8857	0.3173	0.8356	4.3949	1.1557	28.1854	0.1882	0.6546
Accipiter nisus	0.856	0	4.0624	34.1143	2.3557	0.2087	0.7095	1.078	4.1638	0.1956	0.6898	6.0295	1.1417	0.6075	23.4871	21.1566	0.6404
Accipiter soloensis	0.9133	0.1498	40.1736	9.8959	0.009	0.7441	0.746	4.2783	3.5693	1.4704	0.8805	7.4155	2.9191	0.4503	18.3332	8.965	0.4935
Accipiter trivirgatus	0.8775	0.234	13.5686	2.1082	0.7387	0.8689	0.451	5.2415	62.1562	1.1078	0.1277	3.5005	0.1136	2.3232	6.7506	0.7096	0.4755
Accipiter virgatus	0.9391	1.083	12.8187	7.8035	0.4923	1.7167	23.4172	3.9289	35.5345	0.6035	0.115	9.1745	0.7738	0.1791	1.0073	1.352	0.4822
Acridotheres cristatellus	0.6913	5.5079	25.3614	9.9447	10.5189	2.6429	1.169	21.5668	4.0578	0.2734	0.4597	2.7427	0.6421	6.2089	7.5463	1.3576	0.5048
Acridotheres grandis	0.9986	31.9871	15.3138	1.8291	0.0393	23.7688	0	0.3929	6.9996	0	0.5873	0	0	0	7.8985	11.1836	0.8291
Acridotheres tristis	0.9789	4.9606	18.0679	0.1701	0.0148	7.521	59.0248	8.9846	0	0.049	0.0409	0.2447	0.0511	0.0303	0.4892	0.3509	0.71
Acrocephalus bistrigiceps	0.909	2.1675	9.3545	9.0212	1.563	4.9191	0.5922	0.5408	7.5048	1.0548	11.3391	5.9741	8.6155	3.9846	26.6156	6.753	0.5442
Acrocephalus orientalis	0.9065	0	6.1373	1.0808	0.0289	0	0.9199	0.6147	2.4813	0.087	33.0424	3.8302	1.1581	0.1399	44.4226	6.0571	0.5154
Actitis hypoleucos	0.87	1.9089	30.518	9.9969	0.4495	0.1374	1.132	2.5683	5.2131	0.4902	6.765	1.1255	1.5438	0.3341	18.3731	19.4443	0.5252
Aegithalos caudatus	0.9626	47.1963	0.6209	16.0771	7.8514	0	0	0	13.23	0	0	1.1011	2.0694	0.4738	11.3799	0	0.4252
Aegithalos concinnus	0.9239	0.0565	0.024	3.1843	0.8596	1.0888	1.0656	6.1178	67.3394	0.9785	0.2921	5.6121	0.4423	1.3986	10.4266	1.1138	0.4754
Aegithalos glaucogularis	0.9449	17.3105	2.772	8.596	0.5285	1.3202	4.3816	7.1857	2.6704	1.0546	2.1915	5.9558	2.6584	2.1035	26.3676	14.9039	0.7247
Aegypius monachus	0.9328	84.59	2.3504	0.4661	0	7.8817	0.2605	0.2469	0.5876	0.4084	0	1.3409	0	0.2102	1.5521	0.1051	0.5655
Aerodramus brevirostris	0.9265	21.5598	27.5175	0	0	0.5006	0	5.3724	0.5397	0	2.9796	1.6033	3.3937	0.1627	29.2407	7.1299	0.5393
Aethopyga christinae	0.8246	13.167	4.0806	3.3618	0.0723	1.1177	6.3339	12.8969	46.8174	0.5209	0.8465	5.4089	2.0506	0.5942	2.0884	0.6429	0.2976
Aethopyga gouldiae	0.9972	1.0587	41.6652	0	0	4.6633	40.2125	0.019	5.0082	0	0	0	0.0674	0	7.3057	0	0.7133
Agropsar sturninus	0.9721	6.4111	4.5663	0.7111	0.6821	12.7389	1.531	2.4241	3.4265	1.4782	23.3549	3.5648	2.5252	9.8925	19.3405	7.3526	0.5455
Aix galericulata	0.9177	0.4385	16.5477	21.7952	3.5413	2.64	0.5552	1.6807	0	0.4495	10.0928	12.1469	5.0379	2.6677	19.7535	2.653	0.5137
Alauda arvensis	0.9041	0	2.4333	7.9974	0.5834	6.0251	2.9099	0.1237	2.8884	2.7345	25.8829	2.8107	2.1874	0	21.8153	21.6081	0.4418
Alauda gulgula	0.933	0	3.6052	0.1153	0	0.098	0.0001	0	43.5861	0.0156	19.4299	0	0.0502	0.5559	32.4211	0.1225	0.4802
Alaudala cheleensis	0.9872	10.4961	6.2779	0	2.795	0.2895	0	0.1541	12.2341	0.2467	0.9187	0.0322	0	5.9845	48.6871	11.8843	0.2813
Alcedo atthis	0.748	5.3944	13.9755	15.7607	4.0292	0	2.781	6.4203	4.0962	1.6532	0.5586	2.2816	3.0198	2.2118	23.8738	13.9438	0.6199
Alcippe morrisonia	0.9267	0.2203	1.8277	0.6893	0.3484	2.9573	4.4174	3.1163	44.0849	0.3954	1.7835	24.7751	0.0295	1.8429	11.0963	2.4156	0.4528
Amaurornis phoenicurus	0.8632	2.314	18.2412	1.5569	5.6673	0.5885	0	10.5326	47.1588	0.7796	0.1889	1.525	0.5141	0.1448	5.1443	5.644	0.483
Anas acuta	0.9284	0	15.3839	0.1254	2.731	3.7951	0.0279	1.3381	2.3258	1.7603	32.6025	3.6853	0.2918	1.176	29.0237	5.7333	0.6151
Anas crecca	0.8862	0.1408	19.8142	6.8546	0.568	0.1103	1.0047	1.1833	0.8246	0.2251	32.7589	0.2044	0	0	22.7231	13.5878	0.4797
Anas platyrhynchos	0.8728	0.1296	4.395	6.4639	0.8834	1.181	1.4202	0.227	0.5855	0.1027	2.3406	2.3193	0.0047	2.076	33.1437	44.7274	0.4786
Anas poecilorhyncha	0.8806	0.3621	10.0651	6.0772	0.0806	0.6334	0.0333	0.2348	0.2481	1.4226	9.9166	0.6371	0.095	1.2226	25.8613	43.1103	0.5084
Anser albifrons	0.9401	1.5718	10.006	3.6841	0	3.6234	0.7892	0.0023	1.5652	0.6475	2.2583	2.8409	2.2723	9.5128	52.2869	8.9392	0.4714
Anser anser	0.9607	0.4716	1.2928	0	0.7091	2.5006	1.5694	0.1346	8.5298	3.02	12.835	25.1417	0.3058	13.768	27.2461	2.4755	0.23
Anser cygnoid	0.9299	0.0808	1.6117	11.9488	0	0.1182	0	5.2054	1.5228	3.5588	4.4334	2.3338	0	5.2181	43.4368	20.5314	0.3366
Anser fabalis	0.927	12.8408	0	34.7883	2.408	1.473	0.0522	1.9405	0.3641	2.2786	2.4948	9.8537	0	0.9647	25.4146	5.1267	0.4831
Anser serrirostris	0.9566	0.2462	20.6577	0.2826	7.0908	0.0952	1.193	0.8	2.5825	1.712	3.6528	0.7708	0.0885	0.0639	38.3415	22.4225	0.4693
Anthus cervinus	0.9239	20.7417	35.6925	3.4871	0.4801	4.2761	0.633	1.9442	3.0647	1.2649	13.3267	1.1637	0.5984	0.6188	10.5178	2.1903	0.5281
Anthus gustavi	0.9199	0	16.812	0.8865	0	0	0	0.7056	0.1732	0.2851	7.4458	0.6038	7.4175	0	65.6705	0	0.6241
Anthus hodgsoni	0.7032	1.1064	25.8952	13.5005	4.3353	0.3885	2.5373	21.8707	7.5353	0.114	1.4429	4.4424	0.1382	0.2881	8.263	8.1424	0.424
Anthus richardi	0.8953	15.9039	30.1208	0.7481	1.144	0.44	2.5139	3.1076	6.3314	1.4559	5.4432	0.7816	3.1609	1.0364	10.9258	16.8865	0.5625
Anthus rubescens	0.8866	0.1873	18.1957	1.1078	0.1192	1.3655	0.0256	2.1383	0.5407	1.1505	27.8121	5.1567	1.1759	0.2752	35.8661	4.8835	0.5399
Anthus spinoletta	0.8711	0	5.9545	4.2539	0	0.2082	0	1.1444	2.5988	0	4.8128	0.0306	0.1025	10.7186	56.5798	13.5958	0.394
Anthus sylvanus	0.9981	0	47.2497	0	0	0	11.5985	10.3332	0	0.4324	11.9072	9.7364	0.0438	0.2576	8.3616	0.0796	0.5248
Apus apus	0.967	0	7.3804	0	0.0545	0.264	1.4912	0.0798	35.1311	0.6065	0.5469	3.2107	7.5019	0.155	17.1456	26.4324	0.4105
Apus nipalensis	0.826	15.2281	3.2058	2.6836	3.3014	0.3973	10.7137	5.3665	43.4713	1.7176	0.2135	2.3894	0.7484	0.0315	2.0269	8.505	0.3089
Apus pacificus	0.9225	0.1957	33.2594	3.9053	0.8271	1.7657	1.5213	1.4226	8.5408	2.4742	1.5849	2.6664	0.6527	1.1877	30.6122	9.3843	0.6056
Aquila fasciata	0.982	0.0023	30.6868	5.0267	0.1405	0.855	42.8624	1.9566	0.1863	2.3019	2.6932	5.5203	1.0567	0	6.2056	0.5056	0.6875
Aquila heliaca	0.996	0	11.2099	3.549	0	16.4891	7.0192	57.3547	2.184	0.17	0	0.3262	0	0.0004	1.6534	0.044	0.8662
Aquila nipalensis	0.9341	19.693	0.6775	1.4422	0	29.7562	0	14.1594	8.8609	0.0105	0.389	0.0274	6.4719	0.7596	17.7524	0	0.7143
Arborophila gingica	0.9828	0.7478	0.2086	6.7309	0	17.3959	0	0	8.664	3.1721	4.4888	38.3052	0.0874	0.1888	6.9286	13.0819	0.3504
Ardea alba	0.8282	1.9437	23.6152	7.4429	1.2795	1.0923	1.368	1.2153	2.3541	0.1949	16.7453	1.9484	0.0872	0	17.6912	23.022	0.4683
Ardea cinerea	0.8175	2.9975	14.8255	19.5037	0.5908	1.7009	1.6229	0.4838	0.6278	1.114	20.4628	1.4626	0	0.4908	22.8984	11.2187	0.4729
Ardea intermedia	0.8863	1.4646	44.6475	10.7375	0.9087	1.09	0.5736	1.8141	2.1686	0.7021	13.7304	1.99	0.2873	0.2661	12.0792	7.5402	0.5
Ardea purpurea	0.9295	0.5301	5.6836	0.1712	1.7521	7.3642	0.2016	0.6034	3.8399	0.0056	29.37	0.5101	1.3937	0.6332	41.322	6.6192	0.4606
Ardeola bacchus	0.7501	10.3536	12.3276	0.8378	7.2948	0.4086	1.3345	13.9288	4.7419	1.0197	5.4587	3.2788	1.5902	1.6384	17.839	17.9476	0.5634
Arenaria interpres	0.9674	1.018	0.7615	0.0582	0.796	3.8126	1.6758	0.0044	5.4745	0.8997	19.0174	0.9975	0.2404	3.1282	50.6477	11.468	0.33
Arundinax aedon	0.9599	2.2855	6.0078	5.3481	0.2898	5.2303	4.2322	0.1286	19.9694	0.7519	3.5997	8.85	10.463	0.778	31.8969	0.169	0.5819
Asio flammeus	0.9433	6.3794	5.9464	36.9458	1.4487	3.949	0	0	1.54	7.663	0.1752	0.2233	1.4546	3.7461	8.9583	21.5702	0.3831
Asio otus	0.9244	0	0	12.1677	0	0	0.2642	0	0	0	5.0074	3.9032	0	0	72.6977	5.9599	0.3665
Athene noctua	0.9581	0	1.3972	17.2248	0	0	4.7525	0.5171	31.7787	0	0.7145	2.2101	4.6637	4.116	12.0835	20.5419	0.18
Aviceda leuphotes	0.9726	0.1301	6.5327	3.7245	0	4.0501	32.6462	0	13.7379	3.3142	2.3687	11.0955	0.0062	4.6675	16.914	0.8125	0.6907
Aythya baeri	0.9317	0.0022	8.1212	6.3208	1.426	1.1304	0.4524	0	1.7142	1.1724	3.3615	9.0322	0.2564	0.3818	36.8119	29.8166	0.4238
Aythya ferina	0.9325	0.5246	9.8095	4.9262	1.4511	3.1902	0.0083	2.0305	0.6757	1.5304	20.961	0.7403	0.219	0.0101	25.6216	28.3015	0.3214
Aythya fuligula	0.9363	0	25.2094	5.3742	0.0336	1.7728	0.3014	3.5817	0.7238	1.6716	14.5009	0.1892	0.2284	0.0544	20.8105	25.5481	0.5763
Aythya marila	0.9673	0	23.3624	1.851	0	2.9619	0	0	2.8082	1.1018	0	0.0052	0.1943	0	55.7225	11.9926	0.3076
Aythya nyroca	0.9008	0.0334	8.2256	0.0614	1.6868	0.0128	0	0	1.883	0.438	4.4121	1.8192	1.6161	6.4505	34.4919	38.8693	0.3736
Babax lanceolatus	0.9703	0	9.2611	12.1596	0.5932	0	6.3415	0	2.6596	1.1917	48.0707	0	2.9517	0.962	15.7741	0.0347	0.1964
Bambusicola thoracicus	0.9388	4.961	0.712	2.4187	0.7622	0.5636	0	1.2668	38.3305	3.6426	0.3978	20.7161	0.4179	1.1539	6.038	18.6191	0.427
Blythipicus pyrrhotis	0.9716	0.0392	4.7684	0.7397	0	0.0672	8.6835	6.7865	12.9609	0.0245	0.0762	53.7136	0.3605	2.8206	0.4168	8.5424	0.5762
Bombycilla garrulus	0.9541	0	1.9565	46.5028	0.5802	1.1029	0	0	0.158	1.3552	0.5575	1.7302	8.627	1.0652	31.6585	4.706	0.4706
Bombycilla japonica	0.95	0	5.6038	16.6672	0.6066	0	0.3268	3.4206	2.3756	0.1085	0.8681	1.2027	13.163	0	50.763	4.8941	0.3499
Botaurus stellaris	0.9359	0.0638	4.1242	0.9329	2.6131	3.3813	1.7042	0.2195	0.2173	1.9355	20.604	6.7555	0	11.0146	41.3585	5.0757	0.4905
Brachypteryx leucophris	0.9679	9.8056	7.1205	2.4815	0.5777	2.5435	27.6173	0.2676	5.9729	0.0627	1.8184	28.2055	0.1181	3.7852	5.9347	3.6889	0.4854
Bubo bubo	0.9539	0	21.3593	6.9772	2.2112	3.9977	1.2001	1.7523	16.1833	0.5366	0.1315	28.7669	4.2676	3.3231	8.3214	0.9718	0.4303
Bubulcus ibis	0.8311	4.3357	44.1972	7.341	0.2502	0.8104	1.254	3.7031	4.8726	0.8087	11.797	1.3481	0.6784	2.8001	8.2372	7.5664	0.5305
Bucephala clangula	0.9825	3.9637	4.5887	6.8942	0.2983	0	0.0064	0	24.1679	0.5016	5.9823	2.6208	0.003	2.6407	11.4272	36.9052	0.3303
Butastur indicus	0.9038	0.0163	42.7901	0.904	0.0489	0.4774	3.2529	5.2014	8.4202	2.763	0.3349	5.2916	4.089	0.2794	26.1206	0.0104	0.4976
Buteo hemilasius	0.9597	1.3111	3.5831	40.4081	0	0.0117	0.3804	0	26.7306	1.0038	4.1568	1.685	0	3.6431	7.6438	9.4425	0.5266
Buteo japonicus	0.8083	0.3071	42.5946	12.4401	0.296	0.0486	1.546	7.6288	6.1997	0.4564	2.6348	1.8394	0.5821	0.7923	17.6799	4.9541	0.5491
Buteo lagopus	0.9922	3.1575	1.0417	37.8135	0	0	8.8269	0	5.6762	8.9986	0	5.7655	0.18	0.0002	7.1889	21.3509	0.5822
Butorides striata	0.9211	0.5416	52.3419	7.4632	2.9326	1.3634	0.5523	2.2107	1.3183	0.2409	0.5273	2.8164	2.9704	0.1563	11.8415	12.7233	0.558
Cacomantis merulinus	0.9073	22.7666	1.51	3.2107	0.823	1.6204	29.5734	0.9534	28.7284	3.219	0.6459	1.5608	0.2695	0.101	2.4165	2.6015	0.4397
Calcarius lapponicus	0.9467	0	9.3104	0	0.2752	0	0	0	1.3009	5.6934	30.8747	0	0	0	47.2871	5.2584	0.6201
Calidris acuminata	0.9578	1.6769	0.889	0.2375	0.8269	0.4004	2.8653	1.0322	1.6455	0.1073	29.7076	2.4451	0.6116	4.4478	50.9514	2.1556	0.4484
Calidris alba	0.9661	1.777	26.2362	4.007	0	0.2558	0.0286	1.4995	2.9516	0.3668	18.7946	0.6813	0.0185	0.6343	22.5155	20.2333	0.3561
Calidris alpina	0.9312	1.8126	11.5242	4.1591	2.171	2.6151	1.1204	0.2938	1.1957	0.4651	28.1213	1.1877	0.7897	0.1284	6.6311	37.7848	0.4337
Calidris canutus	0.9547	0.3672	1.3401	0	0.2286	2.8371	0.0281	1.9935	1.5145	0.1669	22.0447	1.2548	0	0.5497	64.8903	2.7845	0.33
Calidris falcinellus	0.9593	1.4702	10.5555	0.0034	1.8641	6.8904	4.8657	0	6.1357	2.6653	22.9081	1.3167	1.5974	0	28.8363	10.8912	0.5502
Calidris ferruginea	0.9527	1.9337	7.729	0.939	1.8194	0.021	2.2939	0.6199	3.4601	0.1309	22.5422	2.0709	0.0294	0.1334	53.1441	3.1331	0.598
Calidris minuta	0.9983	0.5158	4.127	0	1.1076	3.9172	0	1.0315	2.9509	1.4228	3.4477	0.3054	1.6197	21.6789	57.8498	0.0257	0.8795
Calidris pugnax	0.9682	0	7.8088	5.4043	1.028	6.0381	0	0.4351	4.5095	0.0262	3.2389	14.3136	1.0104	1.8378	53.8651	0.4841	0.4168
Calidris pygmaea	0.8882	0	61.1485	0	0	0	0	0	0	0	23.8308	0	0	0	15.0207	0	0.278
Calidris ruficollis	0.9514	1.1673	6.5573	2.4072	0.7039	6.0796	2.158	0.3062	2.1746	0.374	28.5353	1.1385	0.4906	2.2823	19.9216	25.7035	0.4526
Calidris subminuta	0.9575	0	2.8217	2.7002	0.26	11.5463	2.2475	0.9933	1.8233	0.1051	28.2443	2.4508	0.1538	0.0561	44.9674	1.6302	0.4682
Calidris temminckii	0.9487	0.1483	7.2983	0.0695	0.102	10.9355	0.2294	1.8878	1.0939	0.8334	21.9852	1.1529	1.4736	9.8368	35.373	7.58	0.3999
Calidris tenuirostris	0.9234	1.5163	11.8848	1.0069	2.3373	12.7118	1.8226	0.1348	2.3675	0.1966	10.6815	1.0868	1.6513	0	39.845	12.7569	0.5863
Calliope calliope	0.9093	0.2132	47.6532	2.4422	0.4774	5.8971	2.0457	0.1377	10.0253	1.6115	0.5823	0.7342	1.5302	0.1658	12.8824	13.6019	0.5929
Caprimulgus affinis	0.9844	26.1277	0.6045	6.5595	0	6.3641	48.6862	0.6377	1.7959	0.0582	0.3776	1.3692	3.7022	0.1162	3.5789	0.0221	0.6922
Caprimulgus indicus	0.9225	2.7702	24.6793	2.383	0.1836	0.6813	4.4719	0.0852	10.231	0.6881	4.8321	5.1146	2.1172	4.2589	36.3388	1.1649	0.5974
Carpodacus erythrinus	0.9104	0	21.6376	1.755	0.4462	2.4056	16.8681	1.6107	21.8055	0.5042	0.0124	8.0392	3.3625	2.7779	18.7251	0.05	0.7067
Carpodacus roseus	0.9871	5.8533	3.9044	58.8723	2.6979	0	0.101	0.4365	7.6134	0.0766	0.3092	4.3048	0.1543	3.9475	9.7322	1.9967	0.6615
Cecropis daurica	0.7805	0.58	19.2078	0.4405	0	0.2914	1.3345	6.0938	4.3843	0.2214	2.9742	5.732	2.1562	0.1743	29.7496	26.6599	0.6398
Centropus bengalensis	0.9169	0.0546	38.0678	0.1669	0.2407	3.2812	0.1592	2.0729	48.1728	0.0978	0.4224	1.7541	0.8764	0	1.2789	3.3544	0.7045
Centropus sinensis	0.8396	20.2894	3.6075	6.9425	0.0355	0.389	16.3536	5.5339	39.1021	0.946	0.7268	0.329	0.0669	0	3.0814	2.5962	0.3207
Certhia familiaris	0.985	0.0098	0	62.0033	0	0	0	0	19.8999	0	0	2.3685	1.3135	0	14.2553	0.1496	0.5698
Ceryle rudis	0.9431	7.7846	2.048	4.4704	4.2014	8.4387	0.1154	0.838	54.4852	1.6933	0.1468	0.8977	2.4945	1.0177	6.1215	5.2468	0.5776
Chalcophaps indica	0.9658	5.09	10.6084	0.2977	0.0598	0.4499	68.288	0.1204	4.2761	0.3622	0.5656	7.3482	0.4228	0.0538	0.9148	1.1421	0.6668
Charadrius alexandrinus	0.916	0.8134	14.3607	1.9383	0.5202	0.8227	0.3484	1.2603	2.0801	0.1327	38.6202	2.6173	0.007	0.0326	22.2638	14.1823	0.5192
Charadrius dubius	0.8849	0.6075	11.7821	2.5008	0	0	1.7425	0.823	1.2195	0.6038	16.4461	1.307	3.6718	0.6491	38.262	20.3846	0.5096
Charadrius leschenaultii	0.9535	0.4179	21.3656	6.165	1.1954	16.6194	0	0.3664	3.286	0.2021	21.602	5.0297	0.0962	0.0054	21.9473	1.7014	0.4172
Charadrius mongolus	0.9561	2.858	8.2088	0.374	3.7675	5.3123	3.5115	1.298	2.1846	2.0231	34.6621	1.0413	0.0121	0.9906	27.1131	6.643	0.3515
Charadrius placidus	0.9486	0.3217	16.096	6.6567	1.1291	10.3619	0	0	6.6198	1.8032	4.5897	8.5101	16.3638	10.0123	17.2427	0.2932	0.2466
Charadrius veredus	0.9727	39.6005	21.2952	0	0	0	0.0673	0	0	0	11.4568	0	4.892	0	21.4216	1.2667	0.298
Chlidonias hybrida	0.9312	0.2489	4.121	0.0542	3.2775	4.5815	0.2849	0.0004	0.4419	0.8542	15.743	9.7581	0.116	14.8206	27.0304	18.6674	0.5508
Chlidonias leucopterus	0.9468	2.8615	2.8321	0.8749	0	2.3441	1.1985	0.5191	1.8333	2.9871	52.0233	0.8424	0.0857	4.8322	15.9147	10.851	0.5369
Chloris sinica	0.8444	1.0943	8.3172	18.9183	1.4586	0.2761	1.2898	1.0552	2.069	0.2999	0.5805	8.4027	15.1541	1.9231	28.9404	10.2207	0.6192
Chloropsis hardwickii	0.9597	3.5526	3.4705	2.4268	0.3003	4.1242	41.0441	1.953	12.5809	0.4577	0.9096	12.7565	0.7264	4.9338	3.9443	6.8194	0.5631
Chroicocephalus ridibundus	0.9159	0.1358	10.12	2.2992	2.8199	1.6428	0.2157	0.1468	2.4367	0.2195	23.193	1.7601	0.0014	0	24.3593	30.6497	0.5393
Ciconia boyciana	0.9417	0.0897	21.7267	2.5427	2.5968	0.6982	3.4357	0.1886	5.6917	1.4751	27.3767	1.4379	1.7574	0.2267	22.2675	8.4884	0.4324
Ciconia nigra	0.9762	0	24.9268	0	7.2484	3.3903	0.3011	0.0932	37.3004	3.808	0	14.8995	0	4.8602	3.1026	0.0696	0.7306
Cinclus pallasii	0.9177	0	0.5146	0	0	4.0396	1.691	0	41.2608	0.001	21.3056	0	0	2.0935	29.0939	0	0.3673
Circus cyaneus	0.9388	6.6985	8.9481	9.0284	5.9985	0.2632	0.3066	0.0139	1.6813	0.1985	13.498	15.6889	0.0016	0.6556	17.092	19.9269	0.6001
Circus melanoleucos	0.9198	3.0241	7.0102	2.6513	1.051	11.0544	0.4815	0	7.0809	0.2365	1.729	6.5305	0.0505	1.4098	32.9251	24.7651	0.588
Circus spilonotus	0.9264	1.1305	9.9209	2.9028	1.3326	15.8039	1.0437	1.2294	2.3021	0	10.4355	0.5098	0.8404	6.4132	39.9597	6.1755	0.5841
Cissa hypoleuca	0.9967	0.8581	18.8087	1.8576	0	11.028	45.5457	5.6944	6.9282	0	0.7387	2.3399	0.2708	0.0232	5.7573	0.1491	0.7048
Cisticola exilis	0.9783	0.0726	13.5906	2.4714	0.0036	4.0166	75.2555	0	0	1.7806	0.0611	0.8983	0	0.0097	1.7404	0.0995	0.6979
Cisticola juncidis	0.867	2.0996	38.1461	3.2989	0.1362	0.4458	0.9212	0.2896	4.1451	0.3453	17.8286	1.4877	0.0144	2.8763	9.7041	18.2613	0.5743
Clamator coromandus	0.9386	2.283	1.3451	3.3895	0.1625	1.5467	8.2582	4.0504	52.1045	2.1523	0.3704	16.7584	0.2702	0.6125	2.7531	3.943	0.4905
Clanga clanga	0.9639	0	33.5665	8.8807	0	20.6581	2.599	1.0859	10.0815	0.003	0	0.9218	3.3502	0.0848	16.2785	2.49	0.5776
Coccothraustes coccothraustes	0.9221	0	0.0653	49.0532	0	0.0507	0	0.0578	0	0.3976	5.8346	0.4776	0.0974	0.2664	40.7057	2.9937	0.448
Columba livia	0.8324	1.0657	27.6383	12.5992	4.6926	0.069	1.8099	0.4497	7.9223	0.3103	0.5779	0.4439	14.1882	1.7537	11.9499	14.5293	0.5911
Columba rupestris	0.97	18.4861	3.0929	21.292	1.2082	0.7422	1.179	1.575	16.3056	0.3466	0.2064	15.5245	11.4603	0.5924	4.7185	3.2703	0.4341
Copsychus saularis	0.7524	12.6413	3.1219	0.4177	5.6788	2.3195	1.1243	19.8631	45.3789	0.2343	0.9648	0.7816	1.8017	0.6777	3.3242	1.67	0.2698
Corvus corone	0.9664	0	5.013	0.4974	2.7506	0	1.1915	0	39.0377	1.6204	3.5062	4.5409	12.47	0	15.4508	13.9214	0.3568
Corvus dauuricus	0.9705	1.6683	5.3819	0.682	0	0	4.8869	0.0983	23.3644	5.164	0.8612	14.9256	1.1865	0.6925	19.1572	21.9314	0.5181
Corvus frugilegus	0.9422	1.2599	4.6244	0	0.441	0.5282	0.1249	0.8152	1.622	3.9571	16.3322	0.5392	0.0002	20.3594	23.3365	26.0597	0.3686
Corvus macrorhynchos	0.8122	1.3707	11.3411	9.3384	0	0.8554	0.8711	17.094	16.8698	1.1442	1.8171	21.6448	0.2666	0	14.2027	3.1842	0.5353
Corvus pectoralis	0.9677	0.8237	4.0151	7.4168	0.3256	0.7015	84.5589	0.0922	0.2815	0.3105	0.0229	0.1216	0.1816	0.2854	0.326	0.5366	0.7422
Corvus splendens	0.9881	0	72.9548	0.1049	0	0.2727	13.4349	9.7467	0.0267	0.5899	0	0.0261	0.0106	0	2.1744	0.6584	0.6908
Coturnix japonica	0.8813	0.4045	8.9862	4.0983	3.1967	4.1244	4.3259	1.385	3.0848	0.579	17.5074	1.9113	0.2586	0	42.984	7.1541	0.5906
Cuculus canorus	0.9164	0.3028	5.5158	12.8688	0.3435	0.4892	2.5505	0.3491	5.6944	2.2557	1.5251	2.9764	2.2364	0.8372	33.3087	28.7463	0.4656
Cuculus micropterus	0.9035	0.0241	19.3219	0.4861	1.9333	11.3699	0.5904	3.4764	1.3863	0.9592	2.3052	2.2148	3.0433	1.3065	48.9773	2.6053	0.6112
Cuculus optatus	0.8951	0	0.9282	1.1406	0	1.9962	3.4414	1.1149	18.1485	0.5505	7.9041	0.1925	14.845	0.2378	46.5715	2.9287	0.5579
Cuculus poliocephalus	0.9522	0.1921	21.4665	0.1881	1.1271	0.8151	3.4683	1.737	0.2568	1.9866	0.0457	9.179	1.3657	0.4598	27.1079	30.6041	0.4152
Culicicapa ceylonensis	0.9648	3.5294	34.1904	2.7572	3.0764	8.6615	36.6159	0.944	0.6019	0.165	0.1588	1.992	0.0831	1.495	4.636	1.0933	0.7177
Cyanoderma ruficeps	0.8493	0.2763	0.8129	1.0543	2.8168	4.1291	18.2577	1.14	44.1012	0.0162	0.2146	17.0038	2.6059	0.9931	6.1233	0.4548	0.3894
Cyanopica cyanus	0.882	1.3557	2.3615	17.4627	2.5029	2.7414	1.2769	0.3726	7.0986	0.7292	0.8167	2.7647	0.5202	0.0117	49.6186	10.3667	0.5457
Cyanoptila cyanomelana	0.9208	0.9791	34.3673	0.2302	0.209	1.1212	0.3965	3.8742	6.0948	1.0847	3.1888	4.7091	3.5995	8.4558	31.6253	0.0647	0.6207
Cygnus columbianus	0.9456	0.8915	1.653	6.3851	0	0.0563	0.2366	3.5188	0.0053	8.9262	0	12.0002	4.2332	8.8215	27.7516	25.5208	0.5507
Cygnus cygnus	0.948	0.7978	2.1699	35.7126	0.3822	0.4098	0.4379	3.9052	0.8737	2.5815	6.5564	1.8093	3.3362	3.505	36.2627	1.2595	0.4786
Cygnus olor	0.9688	4.026	0.0268	2.7402	0	0	1.4822	4.225	2.7021	3.2069	0.0025	3.8957	0.0018	15.9346	38.605	23.1512	0.2697
Cyornis brunneatus	0.9866	0.0735	23.0472	1.2268	0	0	0.777	3.1026	27.7281	3.9161	0.0079	1.0197	0	14.6691	21.6785	2.7534	0.5011
Cyornis hainanus	0.9525	21.8337	4.2048	3.0906	0	0.261	51.5867	0.6329	0.6847	0.9173	0.1746	8.7601	0.0006	0.2466	5.6949	1.9115	0.6021
Delichon dasypus	0.9288	0.6601	58.1937	0.2817	0.2667	2.3295	0.3638	4.5317	2.8267	1.0575	1.9461	2.6723	2.6359	1.8282	15.4284	4.9779	0.5641
Delichon urbicum	0.9847	0	6.7737	0.9476	0.0002	3.6116	0	0.0773	9.929	0.7637	3.6228	2.8214	3.4581	0.6238	15.0221	52.3487	0.5151
Dendrocitta formosae	0.9157	0.1664	2.7585	1.2149	0.2634	2.3089	0.1021	4.6335	56.1031	0.7141	0.288	20.3312	0.4333	1.867	6.2084	2.6073	0.4635
Dendrocopos canicapillus	0.7982	7.9914	0	0.0008	0.0016	0	2.4519	1.757	0.6528	0.0037	1.2628	6.3355	0	6.5008	72.0927	0.9491	0.494
Dendrocopos hyperythrus	0.9798	0.4426	4.7782	0.6031	0.5985	0	0.0054	1.4355	53.3107	0	0.4686	0.552	1.724	6.8918	23.0492	6.1406	0.2806
Dendrocopos major	0.9061	37.2556	2.6031	7.496	0.285	0	1.6667	0.0297	7.1852	0.0315	0.8324	2.0412	2.332	0.4655	31.5125	6.2635	0.5712
Dendronanthus indicus	0.9087	0.0352	20.6193	25.0578	0.2841	0.0916	10.7437	0.8708	13.3583	0.2067	2.3541	1.1105	3.918	2.1325	17.7132	1.5041	0.6404
Dicaeum concolor	0.9866	1.8271	8.4438	2.4065	0.0016	4.1552	30.5246	32.9252	0	2.92	0.0938	12.9756	0.1703	1.2799	2.0467	0.2296	0.2679
Dicaeum cruentatum	0.9504	1.2066	3.2795	0.308	0.0939	6.3733	74.4733	7.842	0	0.0003	0.1061	4.0693	0.6854	0.0026	0.9509	0.6088	0.6324
Dicaeum ignipectus	0.9572	6.3879	1.7142	4.7494	3.0446	3.1441	55.794	8.941	0.0204	1.3707	0.0187	4.8686	0.9401	3.3126	3.2041	2.4895	0.4876
Dicrurus hottentottus	0.8719	1.2916	41.2285	12.8973	1.4491	0.5818	13.6131	0.2121	12.0097	1.083	0.1414	3.1118	1.4067	0.2882	8.9691	1.7167	0.5485
Dicrurus leucophaeus	0.9569	3.877	31.3727	4.1871	0.3212	2.4111	0.6821	0.817	45.8418	0.2141	0.0836	2.4203	0.2058	0.1634	4.2419	3.1609	0.7486
Dicrurus macrocercus	0.8336	15.4074	13.196	1.3524	1.042	4.3946	4.1849	2.3576	7.371	4.3515	8.0127	2.1406	0.7119	1.0538	17.6	16.8236	0.5581
Egretta eulophotes	0.9149	0	20.8579	11.8584	1.4757	0.3362	0.5361	3.7758	1.0166	0.7608	9.0416	8.0453	2.2338	1.9249	20.3535	17.7834	0.4551
Egretta garzetta	0.6776	3.7623	11.2025	3.5246	7.1834	0.71	0.3301	19.0949	2.4523	0.2537	1.1215	1.2669	0.357	22.9215	16.4931	9.326	0.6077
Egretta sacra	0.9887	0	88.5288	0.0094	0	3.9182	2.8614	0	0.5694	0.0061	0.0338	0.947	0	0.063	2.4756	0.5873	0.6904
Elachura formosa	0.9901	0	0.167	18.5656	0.0035	0	0.6838	0.8302	45.4391	3.5311	0	20.9818	4.1694	0.1573	1.2731	4.1982	0.5963
Elanus caeruleus	0.8871	16.035	28.4333	0.5423	0	4.4812	0	0.2308	0.5339	2.0412	17.1839	0.557	0	4.9477	15.0636	9.9501	0.6204
Emberiza aureola	0.9959	0.0003	10.1472	3.474	0	19.1363	21.1209	40.4004	4.8289	0.0667	0	0.262	0	0.0129	0.2488	0.3017	0.8833
Emberiza chrysophrys	0.9122	1.2779	7.2567	33.3055	0	0	0.3061	2.9041	5.2901	0.8802	8.1306	5.6413	9.5083	0.7974	17.9395	6.7625	0.4949
Emberiza cioides	0.9089	23.3775	2.3297	12.0978	0.0371	7.5103	5.2316	0.3697	5.125	2.8945	0.7749	12.9541	0.8701	1.3758	12.1872	12.8648	0.4886
Emberiza elegans	0.9165	30.1346	4.7186	32.7357	0.8653	0.1794	0.9389	0.3241	4.5733	1.0954	0.3158	2.5207	0.0751	0.3332	15.9568	5.2333	0.5495
Emberiza fucata	0.8939	0.2718	13.1403	1.122	0.0749	7.3761	0.9188	2.7985	4.2906	0.7749	27.7572	5.1965	3.161	0.8853	25.3113	6.9208	0.4738
Emberiza godlewskii	0.978	1.4046	0.0103	2.1312	0	0	0	1.7541	52.6712	0.1414	1.3625	29.6104	2.2863	3.9565	3.905	0.7666	0.7345
Emberiza leucocephalos	0.8926	0	12.7869	21.2783	0	0	0	0	8.4059	0	17.9843	2.1884	0	2.7936	28.2804	6.2824	0.5549
Emberiza melanocephala	0.9804	64.5015	10.4244	1.3305	0	2.4532	0	1.7546	9.7068	0	0	0.1776	0.0542	0.1655	7.4413	1.9904	0.7693
Emberiza pallasi	0.9114	0.133	2.7361	21.957	4.2588	1.1081	0.4	0.3904	0.0749	0.3257	2.7824	3.0293	0.1466	0.4416	21.1352	41.0809	0.4643
Emberiza pusilla	0.8577	1.3968	16.0767	5.0796	0.2194	0	3.7119	3.2427	8.6571	2.3109	1.0642	2.1563	12.6429	0	33.3871	10.0544	0.6483
Emberiza rustica	0.9004	0	9.0867	47.2213	0.2125	3.2524	4.5548	0.8995	1.0852	0.1909	13.4579	3.2257	0.0001	0.7486	14.5253	1.539	0.6154
Emberiza rutila	0.9148	0.0581	40.9733	3.5526	0	3.0038	0.3139	1.5028	3.3754	3.1309	1.0166	6.1278	4.0797	0.0354	31.2085	1.6211	0.6451
Emberiza schoeniclus	0.8944	2.0498	0.0404	9.6508	0	0	0.1871	0.0018	0	0.0001	2.6928	0	0	0	34.4658	50.9114	0.3329
Emberiza spodocephala	0.8018	1.2024	22.8446	9.684	1.2353	1.7818	1.0732	9.1289	5.5461	1.6537	2.0581	4.2091	0.9202	1.2228	24.1055	13.3343	0.5425
Emberiza sulphurata	0.9444	0	30.7068	1.1679	0.5751	0	33.302	0	0	0.001	0	0.3274	0.5664	0	33.25	0.1033	0.4591
Emberiza tristrami	0.8841	0.1637	34.5788	2.3168	0.8095	6.063	1.0121	3.6663	8.1182	2.415	0.4992	2.7645	0.3408	2.5869	33.7847	0.8804	0.599
Emberiza yessoensis	0.8467	0	2.83	11.0356	0	0.0792	0	0.02	10.3077	0.6812	0	0.3845	0	9.5029	36.4646	28.6944	0.2929
Enicurus leschenaulti	0.9304	0.2377	4.7469	0	0	1.3904	0	0.3759	29.5148	0.0714	5.9524	8.4766	0	0.2729	14.4342	34.5268	0.466
Enicurus schistaceus	0.9561	0.0881	1.5001	3.5621	0	3.4336	13.1142	0	19.6658	0.915	4.6819	36.4884	4.2624	4.1028	4.1991	3.9865	0.3246
Enicurus scouleri	0.9636	0	16.8963	0	0	24.9492	0	0	26.6493	0	2.9719	0	0.0336	5.5961	21.2865	1.6171	0.2957
Eophona migratoria	0.8857	1.0214	28.729	11.2583	1.4297	0.0957	0.2496	0.2083	1.6578	1.9666	11.4315	2.7779	5.8399	0.0149	25.9654	7.354	0.5998
Eophona personata	0.9617	0.2258	9.455	13.4731	1.1441	0.4138	1.4999	3.4687	5.29	1.2781	0.4818	2.2008	28.3049	0.4478	30.7155	1.6007	0.4698
Erpornis zantholeuca	0.9638	10.3745	0.9452	1.5549	1.1414	0.5815	16.6213	0.0269	14.9204	0.0229	0	38.0324	0	5.4019	1.5529	8.8238	0.4736
Erythrogenys swinhoei	0.9794	0.4335	2.3825	2.6097	0	16.7392	0	0.0002	8.7874	5.4964	0.1474	10.3764	5.4552	0.5233	7.0061	40.0428	0.3263
Eudynamys scolopaceus	0.8263	5.2229	30.4258	1.2299	0.1608	2.0757	0.0239	7.0286	30.0781	1.4539	0.5138	3.23	0.0077	0.1714	7.0942	11.2831	0.4851
Eumyias thalassinus	0.9534	2.6405	10.9903	4.8136	1.477	1.927	6.8184	2.89	49.5898	1.2792	2.1327	1.5084	0.4462	7.4362	4.4482	1.6026	0.6061
Eurystomus orientalis	0.9257	0.4585	52.8858	7.1807	0	3.5919	0.624	1.9536	3.0643	0.4121	0.4338	8.6197	4.6037	0.8642	15.1342	0.1735	0.5586
Falco amurensis	0.8907	1.6377	8.9554	8.936	1.517	8.6587	3.0944	0.2663	12.3434	0.3721	4.6857	6.355	4.0624	0	37.7613	1.3545	0.629
Falco columbarius	0.9547	1.8166	0.4997	45.0314	0.1648	3.6982	2.3046	0.0526	0.1953	5.3007	12.5998	0	5.5453	0	17.8145	4.9766	0.289
Falco peregrinus	0.8922	1.2302	29.0301	7.7272	0.1431	0.0814	0.7035	1.6271	2.4562	0.042	3.5912	5.4083	0.827	0.1377	29.1491	17.8457	0.5447
Falco subbuteo	0.8757	0.0481	22.0009	10.308	0	4.7525	2.2969	1.2048	8.834	1.5199	8.4614	10.0852	0.2431	0.2736	28.4774	1.4941	0.6463
Falco tinnunculus	0.839	5.2408	12.5661	28.8423	0.2623	0.0686	1.5601	0.4415	2.0379	0.1144	6.1932	3.3058	0.0202	0.3209	19.642	19.3838	0.5793
Ficedula albicilla	0.8995	1.6162	20.3405	1.8606	0.7336	2.9875	4.1564	0.1811	12.4304	1.7216	2.2966	1.4743	7.34	0.5301	30.7561	11.5749	0.5619
Ficedula elisae	0.9287	0	0	2.2077	8.5478	0	0	0	38.3116	6.0001	3.5014	0.2696	0.0073	3.2446	36.1988	1.7111	0.8607
Ficedula mugimaki	0.9283	1.5502	36.957	4.3433	0.0847	5.2804	1.5427	0.2622	4.9134	0.4751	0.6067	2.336	6.9881	1.8962	32.6982	0.0659	0.7151
Ficedula narcissina	0.9207	0.7767	43.5628	1.2549	1.6259	7.386	2.2192	0.9039	15.8787	2.1371	0.1245	1.3613	0.2504	5.664	16.3418	0.5129	0.5829
Ficedula parva	0.9593	4.632	43.7592	1.487	0.6391	8.4075	13.14	1.0464	0	0.0855	0	2.026	8.3848	0.422	14.5799	1.3906	0.3552
Ficedula strophiata	0.9528	0	0.1535	2.6099	0	9.1489	33.9013	31.4875	4.2818	0	0.3886	11.9001	0.0319	0.3108	5.7857	0	0.87
Ficedula zanthopygia	0.9255	0.6116	21.5991	7.0409	0.4263	0.7681	7.5114	2.5908	12.869	0.8673	1.624	4.362	4.9626	1.1073	30.8541	2.8054	0.5291
Francolinus pintadeanus	0.9737	2.2953	26.3569	1.3039	0.458	2.8444	55.2093	1.4872	0.6143	1.0856	0.0015	4.571	0.3764	0.4214	2.6914	0.2835	0.4338
Fringilla montifringilla	0.9075	0.5013	6.5671	39.635	0.0265	0.0113	4.2297	2.087	1.4346	0.0708	0.5822	2.1426	4.9097	0.3925	26.4955	10.9143	0.5492
Fulica atra	0.9078	2.9361	14.6504	2.148	0.9392	0.8994	0.1359	2.7939	1.1448	0.6617	13.6983	2.1828	0.0689	3.0361	34.0114	20.6931	0.4679
Gallicrex cinerea	0.9675	25.3226	27.8455	0.4742	0	4.412	0.3316	9.2224	1.097	1.4478	15.9249	0.715	0.1846	0	11.6026	1.42	0.1909
Gallinago gallinago	0.8924	0.0385	23.3008	0.3042	0	0.6317	0.9482	2.5225	3.0678	0.5179	26.3641	1.2666	1.2259	0	35.8216	3.9905	0.5424
Gallinago megala	0.915	0	40.3156	0	0	0	0	0	0	0.5724	28.2464	0	0.4773	0	30.3882	0	0.4992
Gallinula chloropus	0.8547	0.8741	16.2876	3.7979	1.3922	0.3596	0.1103	0.7494	0.6895	0.0488	37.5087	1.1261	5.6324	0.962	24.2004	6.2611	0.567
Garrulax canorus	0.9832	0.1467	17.2529	3.895	1.3331	4.5882	68.9278	0.5065	0.4782	0.5064	0.2965	0.6135	0.0751	0.2643	0.9134	0.2023	0.6961
Garrulax chinensis	0.9901	3.4804	8.0165	2.215	0.9064	2.8156	46.459	21.8691	0.2752	0.001	0.0002	5.269	0.8727	3.6509	3.5863	0.5829	0.7086
Garrulax davidi	0.9936	0	4.6682	0.0253	0	0	0	6.9363	62.6609	0	0.0759	20.2527	3.242	0.4155	1.7158	0.0075	0.4562
Garrulax monileger	0.9813	0	3.7223	0.1142	0	9.4478	0	1.7224	17.3735	0.2758	1.106	36.6466	1.5749	5.2888	14.7558	7.9718	0.3838
Garrulax pectoralis	0.9449	0.2207	7.0816	5.3611	1.856	1.1038	68.4491	2.2502	0.5289	0.4522	0.0349	7.3565	0.0052	1.4384	3.7502	0.1112	0.6672
Garrulax perspicillatus	0.781	8.4455	4.3838	2.2099	2.5901	0.1197	0.5993	19.5707	53.188	0.5463	0.962	1.6092	0	0	2.2145	3.561	0.3402
Garrulax sannio	0.9375	2.443	7.416	1.4549	1.6585	1.9818	0	0.4796	36.8207	0.0458	0.7601	19.1406	0.1312	10.079	16.7003	0.8886	0.4651
Garrulus glandarius	0.9123	0	3.8889	2.5622	1.1584	6.5243	2.9265	0.8778	24.6415	3.8094	1.9421	35.6303	1.9823	1.9761	10.0295	2.0508	0.6789
Gelochelidon nilotica	0.9252	0	1.2297	0.0685	1.1792	0.4421	0.2021	0.0748	1.1728	0.2245	33.9505	2.1578	0.4797	18.8436	35.0171	4.9576	0.6676
Geokichla citrina	0.9691	0.2018	23.7412	4.4335	0.2602	3.6808	51.5337	1.721	0.0032	0.3503	0.3624	2.0329	0.1626	3.7023	7.1688	0.6453	0.6787
Geokichla sibirica	0.9658	0.0249	19.6137	2.3177	0	1.2555	6.6841	2.371	8.7585	0.3618	0.7779	1.9109	13.4067	2.9361	29.5062	10.075	0.561
Glareola maldivarum	0.9372	0.2707	9.6333	0.2399	0.3916	23.5252	0.0067	0.481	1.81	0.7812	28.101	1.191	0.1873	0.2561	26.5724	6.5528	0.4412
Glaucidium brodiei	0.9653	2.4288	4.798	3.0973	0	0.9712	0.1988	0	11.6853	0.6173	1.9482	33.1803	1.7872	0.0178	9.6848	29.585	0.4658
Glaucidium cuculoides	0.9646	0.1323	3.2031	9.0284	2.1391	0.5731	73.1858	0.2793	0.0796	0.0667	2.8113	4.0406	0.3874	0.1111	3.408	0.5541	0.7521
Gorsachius melanolophus	0.9942	0	40.9309	0	0	8.6136	37.0887	3.5896	3.0883	0	0	2.222	0.0885	0.0104	4.3436	0.0244	0.6317
Gracupica nigricollis	0.8218	11.7591	3.6206	0.646	5.0293	2.7769	0.1861	13.9058	52.4427	1.734	1.0359	0.7609	0.095	0.0397	3.6161	2.3519	0.3252
Graminicola striatus	0.9932	0	19.4784	0	1.624	0	51.8898	3.9698	4.5628	0.2537	0.4935	9.9565	0.0093	0.0008	6.2401	1.5214	0.1344
Grus grus	0.9599	0.0005	7.9681	22.2638	2.2067	0.0113	0.5173	1.5341	0	0.0161	3.8108	27.0325	2.4575	0.8649	29.1068	2.2096	0.3737
Grus japonensis	0.9805	7.6263	6.2545	4.0653	3.7777	0.0218	0	3.6243	0	0.1839	1.6599	38.5364	18.0319	0.7435	11.3387	4.1358	0.5606
Grus monacha	0.9759	0.2951	3.3654	12.3014	7.6174	0	0.7502	0.1908	17.0405	3.879	1.8655	26.465	15.7742	1.1972	8.5121	0.7463	0.5983
Haematopus ostralegus	0.9521	3.6339	2.2171	17.4643	5.7865	0.2266	0.1961	0.026	0.7038	0.0302	6.5456	14.2811	1.355	9.6653	20.9078	16.9609	0.4083
Halcyon pileata	0.9261	1.9645	27.786	4.2619	0	16.7629	4.0043	0.1243	4.1422	1.6513	3.0674	4.5614	1.9814	0.8056	25.1656	3.7213	0.6915
Halcyon smyrnensis	0.9265	26.9597	7.4258	4.7717	0.827	0.1032	18.5747	2.4341	29.7122	0.1267	0	0.7069	0.1498	0.0372	2.4086	5.7621	0.4752
Haliaeetus leucogaster	0.9964	2.7304	64.3523	2.6486	1.1959	0.8666	20.0344	2.9742	1.7872	0.0161	0.0009	0.9235	1.0078	0.0276	1.1744	0.2602	0.7428
Harpactes erythrocephalus	0.9889	2.493	0.5298	0.3855	0	5.1457	0	6.4564	4.0238	1.7763	12.3444	18.1082	1.1927	1.0529	11.7827	34.7084	0.4402
Hemixos castanonotus	0.8371	1.349	2.1285	0.449	0.782	6.2421	0.4074	5.5381	57.8575	0.8768	0.877	13.1274	0.8828	1.9352	5.416	2.1313	0.291
Hierococcyx hyperythrus	0.9739	0.2178	2.5987	10.0776	0	0	0.4962	0	26.1595	0.1684	5.8359	7.7968	4.7706	0.4113	40.9393	0.5278	0.4914
Hierococcyx nisicolor	0.9842	0.0198	7.8804	1.1851	0	7.2625	35.4441	34.9533	0	0.0119	0.0934	8.2676	0.0301	1.5744	2.7951	0.4825	0.4952
Hierococcyx sparverioides	0.8664	6.5976	7.5777	2.3299	1.0366	1.3026	55.5827	0.242	3.5842	0.686	0.5781	7.3355	0.8184	0.0745	6.6993	5.555	0.5738
Himantopus himantopus	0.9015	0.7521	16.0975	1.7851	1.9953	3.7925	0.4542	2.3729	3.9073	0.2746	29.7699	1.2402	0.9103	0.262	19.1779	17.208	0.5649
Hirundapus caudacutus	0.9262	0.8074	20.475	3.3671	0.6805	2.3107	1.7239	0.0582	7.4023	7.3733	5.4173	25.8888	5.476	1.1953	15.3178	2.5064	0.5039
Hirundapus cochinchinensis	0.9819	0	17.7877	0.903	0	0	57.7135	3.8825	0.5814	0	0	8.4405	3.9018	0	6.7895	0	0.6313
Hirundo rustica	0.6523	5.6616	10.5318	2.6101	3.951	4.7739	1.677	28.6037	2.1764	0.1719	0.4844	2.3398	3.0631	4.4678	14.3596	15.1277	0.6371
Horornis canturians	0.9024	0.3705	51.9035	20.4345	3.8988	0.8545	0.9497	2.9314	1.1326	0.6104	0.1559	3.7237	0.5544	1.602	10.7978	0.0803	0.5863
Horornis fortipes	0.881	1.0223	1.5593	10.659	0	1.038	0.1577	8.321	61.4161	0.1572	0.1887	10.8209	0.1154	0.6287	1.7657	2.1499	0.3973
Hydrophasianus chirurgus	0.9755	0.0682	31.497	0.8049	0	9.5244	0	2.3447	23.1517	0.0054	5.2813	0.1767	0	1.7353	7.3466	18.0637	0.4502
Hydroprogne caspia	0.9585	5.4755	2.6168	0	1.4083	0.4018	1.3672	0	0.2008	0.5254	3.6819	14.9778	0.0033	0	17.8564	51.4848	0.3499
Hypothymis azurea	0.9733	27.5194	10.9861	4.5028	0.6058	1.3172	42.6929	0.6626	0.0953	0.4574	0.6781	7.3798	0	0.0035	2.733	0.3661	0.5286
Hypsipetes amaurotis	0.9653	1.0251	1.031	63.7214	0.5974	0.0364	0.6109	1.8398	0.5661	0.3699	0.55	1.3302	0.1553	2.4169	21.4331	4.3165	0.4909
Hypsipetes leucocephalus	0.9188	0.0621	0.3705	0.2094	0.4213	2.4253	1.2577	5.2344	53.9905	0.8036	0.0821	17.9405	0.4622	4.7183	9.7994	2.2226	0.4638
Ichthyaetus ichthyaetus	0.9865	0	16.1695	0	0	0	0	0.0084	0	0	3.4096	0.2613	0	0.0166	73.5871	6.5476	0.1709
Ichthyaetus relictus	0.9777	1.4419	1.3737	0.0656	4.52	0	1.7841	0.0865	11.4442	0.0919	12.5383	1.9607	0.0494	4.4961	14.7825	45.3649	0.2551
Ictinaetus malayensis	0.9327	3.6659	0.0112	0.8281	0	5.4899	0	11.8663	31.9593	0.6012	0	7.0653	2.9111	0.036	8.0314	27.5341	0.1924
Ixobrychus cinnamomeus	0.9673	27.1384	5.8766	4.9304	2.5622	18.2944	6.1258	2.5622	1.5494	3.8618	0.7155	1.9851	1.4058	1.6267	4.9965	16.3692	0.5871
Ixobrychus eurhythmus	0.9675	0	5.25	0.928	0	5.9918	0.3987	0	3.3219	2.3538	2.13	2.8733	24.8193	0.6695	48.8612	2.4027	0.5501
Ixobrychus flavicollis	0.9659	0	31.3165	0.3436	1.3396	0.0127	0.2122	0	4.4902	0	1.0573	0	0	0	52.5309	8.697	0.2541
Ixobrychus sinensis	0.8963	0.3276	18.0387	3.607	0.0865	8.2979	0.1249	0.3129	0.7679	1.6777	22.3103	0.5347	0.5521	0.0343	24.4117	18.9158	0.5071
Ixos mcclellandii	0.9299	1.2957	2.5037	1.0487	2.2487	0.7696	0.3616	2.2902	33.323	0.7677	0.8197	45.9089	0.0074	1.2407	4.5662	2.8482	0.3985
Jynx torquilla	0.9245	0	13.3975	0.4772	0.2628	20.2231	0.5439	0.0519	9.3527	0.1869	9.923	1.0626	0.1919	2.4496	35.3648	6.5122	0.6751
Ketupa zeylonensis	0.9977	2.9835	44.3982	0.0102	0	2.1303	6.7542	20.84	1.9927	0.0024	0.0421	18.2493	0.232	0.1746	0.6886	1.502	0.6449
Kittacincla malabarica	0.993	4.8494	58.5025	0.0628	3.4807	4.6649	17.1471	2.6496	0	1.3359	0	1.2865	0.1149	0.3785	3.5285	1.9986	0.6287
Lalage melaschistos	0.9611	0.0032	48.2828	5.9071	1.8581	3.9529	8.2074	0.02	0.1829	0.8526	0.0248	0.6397	0.0039	0	27.7774	2.2873	0.7787
Lanius bucephalus	0.924	0	45.8245	14.4852	0.8352	1.6967	1.4562	3.5401	2.3596	1.9996	0	3.0196	4.7429	0.0864	19.6441	0.3098	0.7103
Lanius cristatus	0.8661	0.7656	20.5482	3.8564	0.1963	1.3692	1.4915	0.548	5.3541	0.4545	9.7101	0.6463	3.2414	0	32.347	19.4715	0.6011
Lanius schach	0.6782	7.0156	38.0121	0.6583	0.5746	3.7034	1.7782	16.129	0.6081	0.6882	0.8618	0.807	1.4378	14.2125	11.7309	1.7824	0.37
Lanius sphenocercus	0.938	8.9903	7.2369	0.4006	4.5942	0	0.3621	0	0.4718	0.6047	3.9553	0.4892	0.5543	3.6076	23.8771	44.8557	0.4992
Lanius tigrinus	0.9121	0	5.6814	11.3487	0	1.019	0	0.1143	0.3918	0	0.8337	5.2396	13.1294	0	46.1297	16.1124	0.4017
Larus canus	0.9599	1.3604	1.7338	25.5991	2.3826	0.3445	0	3.1795	0.69	0.0038	11.4007	0.0025	0	0	10.4889	42.8141	0.3671
Larus crassirostris	0.9379	0.2136	4.4902	28.0999	0.4469	1.1968	1.941	2.0619	3.933	0.8711	5.8646	1.1899	0.6822	0.0923	11.0113	37.9053	0.5233
Larus fuscus	0.9608	0.5264	10.4311	4.588	0.966	11.0382	0	2.1407	0.1807	1.4603	1.5809	0.1757	1.3396	1.7104	15.4748	48.3871	0.1987
Larus smithsonianus	0.9352	3.8459	9.2864	6.567	4.1346	0.1071	0.0886	1.4376	2.3696	0.6035	4.08	0.4249	0.1365	0.3238	16.87	49.7247	0.5242
Larvivora akahige	0.9453	4.5379	14.891	3.1421	2.67	0	0.6557	0	33.492	0.0818	1.1503	11.4052	1.8419	0.0123	26.1199	0	0.2792
Larvivora cyane	0.9508	0.0034	18.2497	3.9518	0.0861	1.3501	5.8137	1.1553	18.0561	0.3605	0.1094	9.394	8.5862	0.5715	23.4419	8.8701	0.5909
Larvivora sibilans	0.9374	0.726	39.6724	4.8745	3.0783	2.4292	4.8082	1.0461	13.3114	1.5055	2.4965	0.7849	3.4838	1.2967	19.4924	0.994	0.6303
Leiothrix argentauris	0.9907	0	58.8357	0.0359	0.519	2.258	31.734	2.7682	0.1445	0.0599	0.1087	0.9855	0.078	0.0004	2.0769	0.3955	0.7309
Leiothrix lutea	0.9526	3.3946	0.8346	0.7747	0.4115	4.9162	0	1.7107	27.0276	2.0456	2.6129	27.7135	0.2301	11.6629	13.7482	2.9169	0.4667
Lewinia striata	0.9693	20.8188	12.7457	2.4225	1.5117	15.2866	25.5185	0	0	0.3031	8.6654	1.3392	0.4125	0.2057	5.8979	4.8724	0.3532
Limnodromus scolopaceus	0.9622	0	14.966	0	0	0.1287	0	0	0.5158	0.0059	0.2671	0	1.2867	0.1416	76.3811	6.3071	0.657
Limnodromus semipalmatus	0.9695	0	5.6051	0.6195	0.5118	19.5265	2.5206	0.2789	2.9455	3.245	6.2324	4.3938	1.0905	2.5172	32.6003	17.913	0.4837
Limosa lapponica	0.9332	1.1384	4.6349	3.8582	1.7715	3.3398	1.7493	0.0716	5.8687	0.0789	28.8569	0.022	1.1567	0	46.9604	0.4926	0.4594
Limosa limosa	0.9463	0	13.87	0.6251	1.1886	4.2832	1.8035	1.8697	7.5107	0	22.9052	2.8235	1.0739	0	23.4471	18.5996	0.6233
Locustella certhiola	0.9568	0	39.8855	1.4443	0.8229	3.972	0.5523	0.4114	10.3681	0.9181	2.414	2.8665	4.0953	0.2684	25.7262	6.2549	0.7494
Locustella davidi	0.988	0	22.978	0	0	2.5525	0	3.373	12.647	2.1484	0.1422	1.1607	7.1358	0.4385	1.9209	45.503	0.6464
Locustella lanceolata	0.9394	0.0189	17.5963	5.3157	0	8.0064	6.4444	1.6783	6.3255	0.3373	0.8601	4.2675	14.857	2.1559	29.6736	2.4629	0.6066
Locustella luteoventris	0.9951	1.3497	54.6627	1.8903	1.975	2.9004	15.0183	1.247	0.4584	1.8302	0.6445	0	2.2452	0.0696	6.434	9.2747	0.3833
Locustella mandelli	0.9815	0.5339	12.6184	1.6786	1.0578	2.7155	66.3895	1.5498	1.5414	0.217	0.095	6.6453	0.1773	0.122	3.683	0.9754	0.6826
Lonchura punctulata	0.8585	9.8517	3.3898	1.1819	4.1926	0.645	0.4133	6.4573	63.3578	0.348	0.0933	1.5371	1.736	0.8089	3.4804	2.5072	0.4219
Lonchura striata	0.8272	1.3091	11.0514	2.5624	1.1608	0.0322	0.0391	9.0229	69.0693	0.6385	0.0112	2.0567	0	0.0617	2.7279	0.2567	0.469
Lophura nycthemera	0.9449	0.1415	2.6613	9.8181	1.0213	8.0219	14.1478	0.1699	37.203	0.8369	0	7.5022	1.7954	0.614	9.3027	6.7642	0.468
Luscinia svecica	0.9455	0	16.6313	0.1315	0.7313	17.7849	4.5403	0.2186	5.5136	1.365	2.0885	3.0897	1.7159	1.114	39.8237	5.2518	0.6236
Machlolophus spilonotus	0.9632	1.9965	0.4826	1.3941	0.5535	2.1665	61.3756	2.2809	1.0601	0.1266	1.8864	17.1629	0.1873	0.695	3.2836	5.3486	0.5053
Macropygia unchall	0.9775	1.4012	6.2418	2.9587	0	2.7916	0.7542	0.0006	15.5356	0.7496	2.5097	26.3654	0.5751	0.0836	11.2748	28.7581	0.3336
Mareca falcata	0.8984	1.6333	14.1957	0.3532	0.0952	0.1536	0.1713	0.305	2.6296	0.0116	11.3016	0.3149	0.3015	0.8189	35.9018	31.8129	0.3426
Mareca penelope	0.9053	0.0238	26.0426	5.9628	0.2286	0.2377	0	0.5636	0.225	1.1494	26.3346	0.2239	0.3368	0.0515	34.1392	4.4805	0.4984
Mareca strepera	0.9333	0.6273	9.3873	4.4811	2.9596	2.199	0.0322	0.347	0.204	1.0523	28.2391	3.5244	0.0003	0.0438	25.87	21.0325	0.2849
Megaceryle lugubris	0.9458	0.1806	43.9664	0.8914	6.2779	0	0.0111	0	0	1.7368	0.7021	5.4902	10.6025	11.4146	18.6599	0.0665	0.4359
Melophus lathami	0.9118	0	8.9128	0	0	0	59.1986	0	0.0123	6.8757	0	9.5628	0	0	15.4378	0	0.5413
Mergellus albellus	0.9582	9.9151	9.4923	0.6637	2.4015	0.069	1.8033	0.793	3.1934	0.2598	5.9399	10.4812	0.2868	2.9723	14.7488	36.98	0.2428
Mergus merganser	0.9368	18.682	3.2954	14.7355	0.2937	2.9628	1.1061	0.0062	0.219	1.1698	5.7756	0.1939	0	0.8408	15.6998	35.0194	0.357
Mergus serrator	0.9506	0	18.9716	0	0	0	0	0	15.3095	0	0.6614	2.0674	0	0	14.983	48.0071	0.4968
Merops philippinus	0.9915	22.1202	13.4403	0.0685	0.0672	41.5358	1.2044	1.9414	8.1731	0.1043	1.6665	3.3395	0.0449	0.0058	6.0975	0.1907	0.5368
Merops viridis	0.9719	1.4421	0.0011	1.4731	0	12.7751	53.7747	6.0058	0	5.7461	0.0146	0.6235	11.6838	0.9897	5.4636	0.0068	0.5087
Milvus migrans	0.7771	4.024	44.7721	0.5222	0	5.1397	1.8888	10.8098	3.1812	0.0249	0.8528	4.2724	0	0	15.3506	9.1615	0.5308
Monticola gularis	0.9456	0	20.4721	5.2241	0.3757	0.5394	5.2351	9.99	12.2434	0.7503	0	4.1517	2.8995	1.9396	32.5314	3.6476	0.6131
Monticola rufiventris	0.9601	0	12.2231	1.5999	0	0	59.3049	0.0469	0	0.015	9.5438	0	0	1.6213	11.4185	4.2267	0.2869
Monticola solitarius	0.934	0	43.0039	4.9572	0.4393	1.4941	1.7874	2.3182	8.9609	0.2628	0.6024	17.9653	2.804	0.3174	14.6077	0.4791	0.6084
Motacilla alba	0.6205	5.7292	7.9325	6.795	3.4267	2.6106	1.8358	34.5663	3.2379	0.6336	0.7987	3.925	0.9905	9.8913	12.3194	5.3077	0.5854
Motacilla cinerea	0.7322	5.6812	8.3074	15.3706	0.3943	1.1719	0.7732	9.048	18.8876	0.654	0.038	6.5523	1.5024	0.1615	25.7421	5.7154	0.4308
Motacilla citreola	0.9694	0.7661	4.7273	0	0	25.2457	3.1299	0.1667	6.7939	1.2222	1.9362	0.6689	10.7905	4.5219	39.607	0.4237	0.4328
Motacilla tschutschensis	0.8665	0.8227	35.1235	1.6393	2.3661	2.6009	2.665	2.8602	6.4976	0.0945	15.2198	0.591	1.0836	0.0176	19.2234	9.1947	0.531
Muscicapa dauurica	0.8794	0.2465	20.8211	7.2564	1.1826	1.2221	5.7429	0.3127	8.7729	1.8368	1.8274	0.5937	5.7339	1.1152	36.0171	7.3185	0.5852
Muscicapa ferruginea	0.9845	2.5468	36.0558	1.5584	0.8721	0.8278	35.0077	0	0.0314	1.1973	0.0223	7.9929	2.4476	1.512	5.1372	4.7908	0.7283
Muscicapa griseisticta	0.9247	0.1387	24.5763	5.693	0.0051	12.1119	2.872	1.4519	6.7307	0.357	0.5258	0.8352	11.654	0.0759	31.769	1.2035	0.6344
Muscicapa muttui	0.9898	7.0127	7.4947	2.2963	2.5029	2.051	38.6266	0.2219	0	0.9355	0.017	8.8101	0.054	9.9316	5.7243	14.3211	0.5749
Muscicapa sibirica	0.9382	0.2652	28.3314	4.0119	0	5.4961	1.6622	0.2234	10.6761	0.5338	0.1692	0.537	6.3458	1.4999	38.7788	1.4694	0.6131
Myiomela leucura	0.9632	32.4306	11.799	0	0	7.5143	25.8338	0	0.8469	0	0.0256	0.5416	0	5.1787	15.8296	0	0.4531
Myophonus caeruleus	0.8435	2.4007	3.787	2.8974	1.245	0.867	47.6997	5.5167	10.0873	1.4945	0.5517	13.465	1.6339	0.4152	6.7586	1.18	0.3741
Neosuthora davidiana	0.9714	4.5152	0	0.9066	4.4056	2.938	0.1304	3.6364	25.9287	1.102	0	53.4605	0	0.4375	2.4069	0.1322	0.3811
Niltava davidi	0.9845	0.2673	56.0404	0.1172	1.88	1.231	2.6409	18.5395	1.3383	0.1594	0	0.3988	0	0.1028	8.1056	9.1786	0.7967
Niltava macgrigoriae	0.9808	0	18.0395	0.2248	5.1885	1.331	31.2865	5.2444	0.2284	1.8476	0.053	25.2643	0.2455	1.3463	9.1782	0.522	0.4102
Ninox japonica	0.9636	0	5.6634	10.2742	1.3522	2.3347	0.9635	0	4.5874	8.3039	0.1615	0.9117	2.3228	0.2733	62.8097	0.0418	0.5386
Nisaetus nipalensis	0.9675	0	1.5626	2.2468	0	17.0156	0.6169	0.8031	21.1372	0.7703	0.096	46.5344	0	1.4531	7.5793	0.1848	0.473
Numenius arquata	0.9278	0.0295	4.8477	0.7831	2.6024	1.1005	4.5316	0	4.0678	0.4762	20.504	1.4883	0	0.0989	11.9258	47.5442	0.5487
Numenius madagascariensis	0.9434	0.0214	1.5474	14.0655	5.9814	0.6511	4.5993	0.1092	5.3966	0.0885	26.1047	0.2776	0	2.6151	28.3486	10.1935	0.4423
Numenius minutus	0.9481	12.3859	1.8515	0	0.0716	0.2404	0.4627	0	2.8882	2.153	37.1535	6.8904	1.3067	5.3685	26.0675	3.16	0.4303
Numenius phaeopus	0.9246	0.0136	10.1969	9.5031	2.0667	3.1052	2.8858	0.3567	5.1353	0.1321	41.5019	2.5809	0	0.0663	20.1519	2.3036	0.5155
Nycticorax nycticorax	0.7906	1.3146	22.3807	3.2452	9.7835	0.6638	0.3458	1.4274	4.511	0.2796	12.9381	1.1165	1.7179	13.0533	19.8861	7.3366	0.5597
Oriolus chinensis	0.8867	0.085	9.7745	11.6847	0.0299	16.3797	2.5144	0.6869	5.0103	1.2006	5.3674	4.6648	5.7607	0	35.8305	1.0106	0.6449
Oriolus mellianus	0.997	0.7768	3.701	15.1702	0	14.7946	34.591	0	3.4656	4.18	0	2.3513	0.228	3.2414	17.3624	0.1376	0.8192
Orthotomus sutorius	0.8176	19.1966	4.4453	5.4978	0.3503	1.5476	0.552	18.3347	38.2006	0.4868	1.3372	0.472	3.3062	0.4945	4.0637	1.7146	0.2483
Otis tarda	0.9715	0.0477	0.1613	0	0	0	6.9371	0.1852	32.4751	0.3666	2.758	29.12	0.16	2.3	18.6035	6.8854	0.355
Otus lettia	0.9666	1.6802	27.2431	2.9619	0.2731	0.9391	63.2732	0.3855	0.3877	0.3194	0.2067	0.4231	0.1138	0.0011	1.7779	0.0142	0.5133
Otus spilocephalus	0.9709	0	2.9216	0	0	3.7475	12.7766	0	10.3202	0	0	0	0	3.9636	20.494	45.7765	0.5826
Otus sunia	0.9279	4.3857	21.4603	13.3454	0.4743	7.6794	0.6687	0.8721	4.9389	1.0193	0.8603	3.9719	0.2669	0.2859	39.6151	0.1557	0.4402
Pandion haliaetus	0.8992	0.4183	43.2913	17.0336	0.5846	3.153	0.0116	4.1086	1.1165	2.6755	7.5895	5.0022	0.3426	0	13.8613	0.8114	0.5439
Paradoxornis heudei	0.9577	12.2386	15.18	0.1012	0.0075	0.0209	0.1854	0.0217	0.1798	0.7595	2.6773	41.7011	0.6125	0.8474	15.9307	9.5364	0.4021
Pardaliparus venustulus	0.9144	1.5614	1.871	25.0849	0.2936	0.4265	2.9194	11.1008	7.7159	0.6665	0.7456	4.7025	1.6505	0.2658	33.3093	7.6862	0.5271
Parus cinereus	0.5939	0.1141	11.3805	11.1289	4.0872	14.3269	0.7272	37.6204	2.5437	0.0078	0.0422	5.5883	0.3479	1.8946	9.2338	0.9564	0.569
Passer cinnamomeus	0.8265	0	0.1602	0.2752	0.676	40.669	1.6072	0.18	2.8167	0.9881	3.8595	23.8885	2.0151	0.201	22.6635	0	0.4844
Passer montanus	0.5817	0.6764	2.7236	11.3644	7.6902	30.3312	0.5751	7.1431	1.7295	0.2693	1.6761	0.8438	2.8939	15.2442	11.2478	5.5914	0.6509
Pericrocotus cantonensis	0.9448	0	12.0061	1.8475	3.6881	2.7204	0	6.0284	40.6541	1.2932	1.6515	2.9525	0.9555	0.1145	15.2976	10.7904	0.5029
Pericrocotus divaricatus	0.9279	0.1244	15.5965	12.8682	0.3926	0.5723	8.8868	2.3923	5.1697	1.0004	2.4994	0.6692	8.5594	3.2938	25.3972	12.5778	0.5328
Pericrocotus flammeus	0.8512	5.6991	1.7839	1.7016	3.9113	5.8588	50.3887	0.5904	16.3421	0.3961	0.7776	5.8807	1.0038	0.4306	4.4647	0.7707	0.3765
Pericrocotus solaris	0.8919	1.0013	1.4818	0.7674	0.3374	1.8263	9.3821	1.0528	45.1627	0.0733	1.6246	28.4118	0.4476	2.6213	5.1496	0.6601	0.4786
Periparus ater	0.9362	27.0455	2.7863	25.0396	3.9158	2.9671	3.8131	0.6693	0.5996	0.3351	0.3577	2.782	1.716	2.3093	19.5869	6.0765	0.477
Pernis ptilorhynchus	0.8899	0.1608	35.158	5.6269	1.7284	3.8987	0.8526	1.9172	5.4065	0.0037	2.1944	2.6147	2.259	0.3029	36.9325	0.9436	0.6364
Phalacrocorax carbo	0.8654	1.6959	25.1343	5.5697	0.0617	0	0.3476	1.6305	0.3387	1.1612	10.0926	4.134	0	2.0674	19.1959	28.5705	0.5099
Phalaropus lobatus	0.9828	0.0078	63.9315	0.561	0.0493	7.8774	5.8213	0.0888	1.4478	1.3156	5.5325	1.3086	0	4.4297	6.8014	0.8272	0.3579
Phasianus colchicus	0.8337	13.4622	2.4784	14.9823	1.0073	0.196	6.7106	0.0928	1.3944	1.362	1.857	3.3532	0	2.2851	29.3264	21.4923	0.63
Phoenicurus auroreus	0.663	1.4808	8.2777	13.3458	6.9293	0.2663	3.5453	28.8214	1.9013	0.9819	0.21	4.5738	0.788	5.3817	19.0407	4.456	0.653
Phyllergates cuculatus	0.9481	0.2206	2.1483	4.1454	0.009	6.503	74.9837	2.774	0.164	0.4175	1.7544	2.5073	0.7464	2.0546	0.7819	0.79	0.4286
Phylloscopus armandii	0.9281	0	0	0	0	0	0	0.1336	54	0.9815	7.0654	0.2363	0.2183	1.2201	36.1448	0	0.6324
Phylloscopus borealis	0.924	1.234	32.5114	3.0795	0.2768	3.2542	0.8474	1.7515	5.6459	0.4539	1.668	1.5324	3.5381	1.9575	32.8428	9.4066	0.6149
Phylloscopus borealoides	0.9743	1.0888	54.6392	6.4454	0.0904	14.7486	0	0.2865	0.0491	0.0176	0	2.0532	0.0242	6.7811	13.513	0.2629	0.4771
Phylloscopus claudiae	0.99	5.9937	1.255	0	0.72	1.8387	2.4464	7.4868	38.847	4.84	3.5018	1.4305	0.6452	2.1617	26.8218	2.0113	0.475
Phylloscopus coronatus	0.9319	0.7083	26.499	3.5442	0.4058	2.3651	2.5365	1.8056	7.88	1.3885	1.8523	3.6143	5.8591	7.3846	32.6248	1.5318	0.5992
Phylloscopus fuscatus	0.8125	7.2639	19.8374	3.1265	3.0513	1.3103	4.5263	2.0227	6.9428	1.4911	0.6278	2.2951	5.068	0.8751	11.6999	29.8617	0.5287
Phylloscopus goodsoni	0.98	1.3342	23.3434	0.4866	3.0554	1.8397	49.5566	1.7209	1.7938	1.3339	0.271	11.4456	0.1625	0.1092	2.3866	1.1606	0.4363
Phylloscopus humei	0.9784	0.004	47.2874	0.3246	4.7269	0.0033	0	4.3501	17.1482	3.1925	0.5402	5.1149	0.3643	3.6605	10.6872	2.596	0.7277
Phylloscopus inornatus	0.6715	1.7903	8.8357	4.8177	2.8366	1.6218	1.7282	22.3031	2.9516	0.9742	0.7841	2.1196	0.617	0.0444	23.05	25.526	0.6609
Phylloscopus ogilviegranti	0.9633	0	50.0829	0	0	0	34.4846	3.2243	1.5503	2.4268	1.179	0	0.0458	0	1.963	5.0433	0.7026
Phylloscopus plumbeitarsus	0.9344	0.0835	27.9891	0.9518	0.5566	3.5732	1.7125	12.9629	18.7791	1.6298	1.0957	2.9393	3.5455	0	15.5722	8.6088	0.625
Phylloscopus proregulus	0.7766	2.194	18.9809	4.6333	4.4829	2.1383	4.4655	9.1707	10.397	1.6959	0.8274	4.4962	3.5881	0.9072	21.4802	10.5425	0.5024
Phylloscopus ricketti	0.9693	4.134	57.1576	3.6213	0	5.2176	8.7158	2.0019	0.0285	0.702	0	0.2104	0	0.6555	8.972	8.5834	0.3408
Phylloscopus schwarzi	0.9354	5.1041	24.0371	4.9158	0.234	0.304	5.1253	0.1052	29.5249	0.2449	1.169	5.0929	2.8205	0	19.8138	1.5085	0.6564
Phylloscopus tenellipes	0.9439	0.0166	53.1763	0.2197	0.0127	8.1596	2.8233	4.4491	8.3373	1.6369	1.5622	0.3364	1.8332	0.675	13.6718	3.09	0.6862
Phylloscopus yunnanensis	0.9815	0	1.385	0	0.2589	0	0.0864	1.9273	45.9847	5.9605	9.328	3.3015	0.0253	3.3474	28.258	0.137	0.5666
Pica pica	0.7363	2.2602	6.0252	34.5139	2.9221	3.9845	3.565	0.9048	1.1074	0.0518	2.5484	3.5521	2.0315	5.8557	15.937	14.7405	0.5951
Picumnus innominatus	0.9384	1.083	0.0092	3.4595	0.4916	2.2345	0.0181	4.5125	60.2549	0.3718	0.4183	13.3327	1.2236	3.0969	6.2574	3.2359	0.4535
Picus canus	0.9232	0.664	11.1747	17.1894	4.0814	7.5602	1.2298	0.863	20.6873	2.4541	0.4809	0.9224	0.0803	6.2394	14.1764	12.1968	0.5949
Platalea leucorodia	0.9577	2.5044	21.4703	2.8276	2.4761	1.2317	0.3071	1.3262	1.9718	0.5024	31.1149	1.0308	0.8052	1.4273	23.6717	7.3324	0.3791
Platalea minor	0.9448	1.8804	61.9157	9.1943	0.2999	6.832	0.3608	0.3264	8.1549	0.0047	3.1063	1.7127	0	0.0172	4.7143	1.4805	0.6982
Pluvialis fulva	0.9331	1.7706	5.1855	0.787	0.5684	15.8657	3.1294	0.4219	4.5878	0.4044	13.2726	0.5342	0.4265	0.0016	38.1733	14.8711	0.5098
Pluvialis squatarola	0.9406	3.4865	3.9812	0.5848	1.4667	5.0038	4.164	0.1641	7.0094	0.1754	30.1465	1.0147	0.1712	1.8952	24.8297	15.9067	0.5051
Pnoepyga pusilla	0.9607	5.2903	5.0521	2.8117	2.6191	3.0944	38.682	2.2289	0.5517	0.1467	1.8392	24.0593	0.578	1.7322	4.1566	7.158	0.5087
Podiceps cristatus	0.9152	0	3.9082	7.3484	2.8283	1.1661	0.2582	0.0183	0.2959	1.2467	9.7758	1.191	0.1177	0.7603	34.5249	36.5603	0.4777
Podiceps nigricollis	0.9574	0.2507	5.1213	0	1.0047	0.3272	0.3896	9.6434	0.0321	1.1847	0.9627	0.9074	0	0.3732	71.5299	8.273	0.7897
Poecile montanus	0.983	12.2222	4.4518	0	0.2066	0	0	0.2827	46.5429	1.4594	0.4285	23.7151	1.5471	3.8748	5.2689	0	0.4631
Poecile palustris	0.962	9.2599	0.65	2.4414	0.5049	0	2.644	2.0025	39.0047	1.2496	2.0501	10.1741	2.7803	4.0319	21.7207	1.4858	0.387
Pomatorhinus ruficollis	0.879	1.0296	0.3197	0.969	0.193	3.9594	6.1744	0.9325	42.629	0.0842	0.2371	32.6656	4.1378	0.6796	5.5241	0.4652	0.4136
Prinia atrogularis	0.9797	0	0.2405	15.1005	0	2.8907	1.023	0	10.3161	1.4294	28.9519	27.1317	4.3732	0.1022	8.2447	0.1962	0.2756
Prinia crinigera	0.9855	0	0.4813	2.9875	0	0	0	0.6927	58.7871	0.1528	1.022	13.6137	2.4544	7.2673	9.2279	3.3132	0.4213
Prinia flaviventris	0.8287	13.7758	2.6671	5.1431	5.7979	1.0718	6.7426	9.7057	44.0327	1.3243	0.001	1.3188	1.487	0.0543	3.0442	3.8338	0.3063
Prinia inornata	0.8401	3.1402	3.8868	1.1111	0.5458	0.3285	0.5441	4.6232	69.5993	0.5942	0.7127	1.1133	0.004	0.5233	4.9847	8.2888	0.4026
Prunella montanella	0.9861	8.3755	5.6454	37.2017	0	0.0346	0	0	25.001	0.7318	0	3.8688	0.1073	2.6144	15.3419	1.0777	0.3522
Psilopogon faber	0.9713	0.1542	0.1721	5.6781	0	2.9536	45.1789	3.5579	0.0665	1.1922	0.1285	28.2177	0.5249	2.1478	3.6173	6.4102	0.623
Psilopogon virens	0.9501	6.3856	0.6634	4.5835	0.225	1.8051	50.3803	0.3821	3.6127	0.5598	0.2271	16.2821	0.0182	2.6966	4.5	7.6784	0.4593
Psittacula eupatria	0.9896	6.3064	1.124	8.8463	1.4071	12.3589	59.2341	0.8986	0.7918	0.2273	0.0122	3.7975	3.2068	0.068	1.5613	0.1599	0.7167
Psittacula krameri	0.9867	15.2831	28.3482	0	0	3.8795	30.7226	0	0	0.9776	0	0.0181	3.4209	0	17.3098	0.0402	0.3911
Psittiparus gularis	0.9803	4.42	5.0267	0	0	9.8253	0	0.1881	35.8052	0.0738	0.0307	29.5752	0.1495	0.8441	12.9569	1.1043	0.728
Pycnonotus aurigaster	0.8621	38.9158	2.9581	3.6068	2.1625	0.531	0.1893	7.7091	37.2343	0.1994	0.182	0.6057	0.0097	0.0637	3.443	2.1898	0.3558
Pycnonotus jocosus	0.7877	13.4596	4.2731	3.1424	1.4022	2.6947	1.3229	19.9292	40.8731	0.4637	1.6128	0.8482	4.4241	1.6552	2.3275	1.5713	0.2472
Pycnonotus sinensis	0.5447	3.743	4.1421	6.6021	3.3542	18.6827	0.7608	28.9958	3.602	0.0936	0.3412	1.7665	1.506	14.4659	7.5526	4.3914	0.6612
Pycnonotus xanthorrhous	0.9685	0	12.0021	0	0.5346	1.4623	12.4727	0	35.1705	7.0895	0.3365	3.7757	7.9368	0	19.2193	0	0.6511
Pyrrhocorax pyrrhocorax	0.9865	0.0498	0	0	0	1.963	0	0	57.676	0	0.0063	11.776	5.3072	15.0769	8.1448	0	0.6279
Rallina eurizonoides	0.9829	3.53	47.9851	1.1791	0	1.5881	36.6544	4.2617	0.142	0	0.1877	1.1641	0.0561	0.0029	2.6454	0.6034	0.6218
Rallus indicus	0.9352	0.0234	27.7025	2.2022	0.4506	5.9142	0.1983	1.8722	0.9195	1.8359	7.7588	4.9398	2.0536	0.1874	27.3852	16.5563	0.2913
Recurvirostra avosetta	0.9386	0	10.5131	0.2177	3.6634	0.7723	3.7013	0.2095	2.5077	0.837	26.4944	0.2673	0.0041	0	24.7563	26.0558	0.5192
Regulus regulus	0.9578	0.9885	1.7308	40.5575	2.5904	0.0467	1.3387	2.1952	0.6655	2.2994	1.6478	1.5101	0.3809	0.0289	38.724	5.2958	0.8014
Remiz consobrinus	0.9095	0	11.4676	14.3814	0	0	3.6705	1.1495	1.41	0.4228	22.6168	3.5592	0.0085	0.014	26.1587	15.141	0.4948
Rhopophilus pekinensis	0.9845	42.3702	1.72	13.2657	3.0176	2.6085	5.5123	1.7099	12.3779	0.6563	0.3073	7.79	0.0501	3.7105	3.5018	1.4018	0.4061
Rhyacornis fuliginosa	0.9368	2.6422	7.4227	0.5448	0.2237	2.6244	1.2054	2.0786	25.0264	2.9819	1.4747	33.8613	1.3776	1.2919	15.1809	2.0637	0.5637
Riparia diluta	0.9818	0.0698	53.2171	0.5022	0.1099	11.8465	0	1.4188	14.1915	1.8241	10.2557	0.0061	1.3516	0.0133	3.9832	1.2103	0.5684
Riparia riparia	0.9549	0	8.6714	6.0063	2.4406	11.2003	0.4445	1.1889	2.2149	0.3458	19.9077	4.3874	2.6734	5.1557	16.1786	19.1845	0.5848
Rostratula benghalensis	0.9703	37.0534	3.02	9.4479	1.9098	4.5486	24.2679	0.5243	5.191	0.5076	4.0149	2.4061	1.7792	0.14	4.8022	0.3872	0.5199
Saundersilarus saundersi	0.9543	7.5571	5.4834	1.6537	0.0635	2.8526	0.1824	0.3838	3.9633	0.2381	40.3062	1.137	0.2101	0.0721	19.1164	16.7802	0.4329
Saxicola ferreus	0.9736	0.0102	40.1417	1.3471	0.0552	0.8272	4.4788	41.0895	1.6655	1.4697	2.9914	0.4349	0.0308	0	3.5233	1.9348	0.9033
Saxicola maurus	0.8363	12.2313	15.0715	4.8092	0.7393	0.5686	2.8987	1.4518	7.3245	0.6708	15.458	5.2434	0.4298	0.213	16.7429	16.1472	0.5822
Schoeniparus brunneus	0.9392	0	8.1323	0	0	1.2862	8.2021	0.0013	14.2823	0.1117	0.0327	0.0524	16.537	0.1038	49.0014	2.2567	0.2941
Scolopax rusticola	0.9387	0	43.8814	12.7861	0.0458	4.3263	1.6656	0.5012	1.4457	0.2726	0.1916	1.7823	0.5696	0.9946	29.5908	1.9464	0.6699
Seicercus affinis	0.9762	0	7.714	4.2219	0.6881	0	83.2536	0	0.0381	0	0	0	0.0004	0.1403	3.9437	0	0.6708
Seicercus castaniceps	0.9822	0	17.9074	4.7181	0	0.2442	47.3108	6.8416	0.7209	0	0	4.4819	1.0847	1.0538	15.4656	0.171	0.667
Seicercus soror	0.9891	4.4372	65.6879	0.1487	0	2.2626	2.2048	12.7206	1.1742	5.0854	0	0.1696	0	1.5578	4.3228	0.2284	0.5417
Seicercus valentini	0.9931	7.4391	58.2626	0.1521	0.6713	0.0426	12.0811	8.7408	0	0.0099	0	7.1386	0.3322	1.9262	3.0448	0.1588	0.7171
Sibirionetta formosa	0.8932	0.2647	1.1695	37.914	0	0	0.0002	0.0945	0.0026	1.8615	3.8181	4.9375	1.5125	11.3252	37.0992	0.0005	0.4565
Sinosuthora webbiana	0.8331	25.1288	5.0358	21.2104	0.0339	1.4311	3.8929	0.1038	1.4623	0.107	1.408	7.2287	0.6252	3.212	25.2373	3.8827	0.5432
Sitta europaea	0.9946	36.8204	0	8.7411	0	0	0	0	7.5412	4.8504	2.0788	26.0613	0	5.9483	7.9585	0	0.885
Sitta frontalis	0.995	0.2429	5.4192	2.554	0.15	0.1491	13.0814	75.8501	1.4855	0.0037	0.0595	0.1879	0.0413	0.0135	0.7557	0.0064	0.8419
Sitta villosa	0.9558	0	0	0	30.1332	0	0	0	56.3805	3.896	0	0.3074	0	0.8384	8.4444	0	0.393
Sittiparus varius	0.9791	1.0814	0.0135	56.9233	0	0.7325	0.0393	0.0693	0	2.1375	1.875	5.2826	0.5224	10.69	19.9133	0.7199	0.723
Siva cyanouroptera	0.9903	0	0.1114	3.3812	0.0028	1.0727	34.305	54.1936	0	0.0209	0	5.4979	0.1078	0.2484	0.8261	0.2322	0.7498
Spatula clypeata	0.9218	0	31.7448	3.5689	1.0025	1.8802	0.5802	0.0063	0.2427	2.8341	21.4163	0.4493	0.1882	0	28.0859	8.0006	0.6271
Spatula querquedula	0.9516	5.4747	5.9732	3.0644	0.4369	16.1481	3.607	1.3802	1.8452	2.0479	19.4158	1.1318	0.5478	1.0873	22.5086	15.3313	0.4499
Spilornis cheela	0.8868	1.5308	5.7161	2.6157	0.4015	1.767	7.7399	0.9806	53.4084	0.0568	0.1565	19.8465	1.3322	0.1511	3.766	0.5309	0.5365
Spinus spinus	0.9266	1.6936	9.8419	53.7081	0.6455	1.5836	2.7914	1.7297	1.8298	0.1833	0.4932	0.8998	1.3414	0.0866	22.2899	0.882	0.6307
Spizixos semitorques	0.9154	15.5021	13.498	1.2477	2.021	0.3072	2.1942	0.2003	50.5122	0.1616	1.3538	3.5263	1.7847	0	6.1922	1.4986	0.5602
Spodiopsar cineraceus	0.864	0.0895	6.4171	5.178	0.8848	0	0.911	0.219	0.6966	0	27.8116	1.0924	3.7153	3.3097	31.498	18.1768	0.624
Spodiopsar sericeus	0.8967	1.3044	39.469	2.1971	4.6503	0.9194	0.0893	0.1613	17.3666	0.2907	12.3529	1.7482	1.6133	0.155	8.8061	8.8763	0.626
Sterna hirundo	0.9554	1.3198	7.3612	1.0411	2.7703	0.4677	0.9221	1.2495	3.4594	0.7578	10.7249	11.6047	0.9914	0.7849	19.3551	37.1901	0.3155
Sternula albifrons	0.9466	0	7.1916	0.3873	0.4171	0.0076	0.5183	0.2007	0.4486	0.1143	11.2434	0.7409	0.2605	5.1205	19.9046	53.4446	0.358
Streptopelia chinensis	0.578	6.7362	8.7815	6.4242	7.31	12.9816	5.8055	18.8289	3.498	0.0765	0.3223	2.3622	1.3911	10.8687	10.9945	3.6187	0.559
Streptopelia decaocto	0.9263	0.9948	12.8839	7.0338	0	4.6629	9.0262	0.7634	27.4473	0.2023	9.5632	3.0853	2.6307	2.1085	19.4447	0.1529	0.6578
Streptopelia orientalis	0.8111	2.2758	11.6522	27.71	2.0641	0	3.2683	0.4515	3.0853	2.1566	5.0819	3.2593	1.0823	0.2799	29.168	8.4647	0.629
Streptopelia tranquebarica	0.9473	0.7603	51.625	0.9003	0	16.6151	0	0	0.9858	0.8408	0.1714	0.6177	1.3591	5.2245	20.0388	0.8612	0.7427
Strix leptogrammica	0.9961	0	38.7796	0.2511	0	0.1799	15.4216	14.2569	0.1794	0.0522	0	25.7356	0.0127	0.2603	4.3888	0.482	0.6711
Sturnia sinensis	0.9638	39.8682	28.5295	2.1979	0.5193	0.1028	0.2546	0.5893	18.5505	1.673	2.7349	0.2974	0.264	0	1.706	2.7128	0.5317
Sturnus vulgaris	0.9263	0	20.6295	4.2951	0.3569	9.2469	0.4352	0.1802	1.3729	0.0266	16.9229	0.0055	2.7034	2.1769	16.5749	25.0732	0.4673
Surniculus lugubris	0.9836	3.7457	16.2911	3.4227	0	1.4811	39.1407	0.0157	0	3.0846	0.0453	3.6693	0	0.5589	5.8113	22.7336	0.3899
Tachybaptus ruficollis	0.81	2.9825	8.518	14.4961	0.2877	0.1047	1.2965	1.3694	1.0843	0.174	21.7262	3.8335	0.296	4.2921	25.6081	13.9309	0.595
Tadorna ferruginea	0.9543	0	4.9473	11.5941	0.5138	0.3822	1.2241	0.302	4.0644	0.3633	3.8331	0.9052	0.0521	0.1988	13.9541	57.6656	0.4702
Tadorna tadorna	0.9651	5.764	1.1592	18.9805	3.3027	0.4907	0	0	0.1538	0.0866	16.5894	1.0246	0.0082	0.0011	29.2428	23.1966	0.2931
Tarsiger cyanurus	0.8327	0.3318	25.5621	12.7356	0.0764	1.2406	0.9251	2.2535	7.0402	1.3349	1.9263	3.921	1.8929	0.4196	38.374	1.9662	0.5609
Terpsiphone atrocaudata	0.9567	0.0866	23.445	0.8632	0.2647	4.7326	0.3942	3.226	45.0888	0.615	0.1147	2.0036	0.5627	1.5651	14.8695	2.1683	0.6087
Terpsiphone paradisi	0.975	1.2646	37.6571	0.7382	0.7288	7.3786	2.173	4.9145	31.4243	0.102	0.1223	1.6653	0.5411	2.0869	7.2167	1.9867	0.5118
Thalasseus bergii	0.9896	2.7874	29.6579	0	0.8559	2.6636	9.6501	5.9702	26.4803	0.2275	0.3587	3.8405	0	0.6849	14.1799	2.6431	0.3026
Tringa brevipes	0.9596	7.3353	27.7405	0.2112	2.1371	6.9425	9.4327	1.3329	7.5789	0.6766	6.2788	5.301	0.1177	0.0385	20.6347	4.2417	0.5121
Tringa erythropus	0.9402	0	8.4836	0.2468	2.1379	1.9899	1.4391	1.5806	2.6901	1.5416	33.1574	2.4833	0.3422	2.8559	32.77	8.2817	0.4869
Tringa glareola	0.9081	0.9395	12.4659	1.8584	0.499	13.0418	1.6515	2.5533	3.704	0.1974	33.4839	0.3388	4.5094	0	20.0298	4.7272	0.5382
Tringa guttifer	0.9613	0.8082	17.384	0.0206	5.4503	8.4696	6.048	0.3828	2.4928	3.9233	9.0224	0	1.2186	2.8614	41.8717	0.0463	0.5013
Tringa nebularia	0.9087	4.6464	22.908	2.6527	0.1948	0.8286	1.3214	1.3292	3.3149	0.622	27.5974	2.1677	0.0382	0.1996	15.9864	16.1926	0.4933
Tringa ochropus	0.8416	4.172	19.1648	7.0759	0.1028	0.3041	1.2987	1.4968	2.9988	1.7812	26.4204	3.6373	2.6596	6.8129	11.7772	10.2976	0.5441
Tringa stagnatilis	0.9285	0.4521	7.3994	1.0226	0.5445	5.7783	2.8269	1.8259	3.381	0.2913	26.6219	0.0051	1.4887	6.9276	29.6945	11.7401	0.4179
Tringa totanus	0.9466	2.0018	5.5711	3.0569	0.2193	3.7744	1.1393	0.7141	3.5786	0.2616	34.3138	2.5335	0.2236	0.0402	36.2379	6.3339	0.4868
Troglodytes troglodytes	0.9353	7.4051	0	31.6953	0	0	8.8289	0	11.5434	0.0241	0	6.4965	6.8281	1.3508	19.6525	6.1752	0.3868
Turdus cardis	0.9525	1.4084	38.5553	2.2027	2.227	3.4742	0.4324	2.0827	32.4193	0.1649	0	2.1466	0	7.0806	5.5363	2.2695	0.7365
Turdus chrysolaus	0.9551	1.8459	50.0654	2.067	0.9816	0.1306	0.0147	3.2448	2.3498	3.5357	3.5441	2.2633	0.1927	1.3361	26.5019	1.9265	0.5373
Turdus eunomus	0.9219	0.0008	21.0734	15.1099	0.0414	0.0633	0.81	1.3679	0.9224	0.8418	20.2686	0.719	4.0801	0.0964	33.6453	0.9597	0.5798
Turdus feae	0.9448	0.8572	0	0	0	7.8245	0.0239	0	43.6321	0.789	0	1.9953	0	0.4216	44.4564	0	0.7842
Turdus hortulorum	0.8795	0.387	54.9394	6.2746	2.3902	0.0834	0.7125	1.3509	1.9761	0.7655	1.7086	1.8567	2.1364	0.0396	22.8037	2.5754	0.6383
Turdus mandarinus	0.7712	1.1751	34.5862	12.5573	11.1821	1.686	0.2194	1.5299	8.3959	0.3052	2.5689	1.6467	2.5615	14.7191	5.8838	0.9826	0.4958
Turdus mupinensis	0.9852	8.9578	3.8948	0	0.0345	0.0778	0.1287	0.0595	5.3138	1.2671	3.9427	8.2142	5.5414	0.2147	57.2948	5.0582	0.5267
Turdus naumanni	0.9248	1.5184	12.971	26.7378	0.4053	0	0.2491	0.5039	1.9745	0.2406	3.0176	1.581	0.0012	0.7628	26.6365	23.4002	0.439
Turdus obscurus	0.9179	1.3235	33.6766	0.5979	0.1894	3.6106	1.8162	1.9963	8.0891	0.9358	0.5772	0.5187	4.6795	2.7222	36.8385	2.4286	0.7507
Turdus pallidus	0.9303	0	38.4609	10.2767	2.7939	1.7691	0.496	3.6738	16.106	0.8284	0.0947	0.7653	0	0.2955	24.2914	0.1483	0.7133
Turdus ruficollis	0.9742	0	3.2378	25.2297	0	0	8.2953	0	1.6073	0.0179	0.1601	0.2605	1.4429	0.044	49.976	9.7284	0.4426
Turnix tanki	0.9446	0	12.539	0	0.5658	0	1.0866	0.6996	0.5791	0.516	0	1.8617	4.1476	0	73.8883	4.1164	0.332
Tyto longimembris	0.9926	4.1264	0.572	6.3602	0.1199	0.7666	0.2107	1.6458	55.485	1.5515	3.6109	7.3279	3.4677	0.0384	4.9952	9.7218	0.2389
Upupa epops	0.866	0.1886	9.1285	4.6434	2.0751	0.0702	0.8753	3.4468	4.9247	0.3935	15.6845	1.7263	2.5644	0.5669	21.8331	31.8787	0.6244
Urocissa erythroryncha	0.9444	1.9631	12.6482	3.8729	1.5884	0.738	68.5171	4.1614	0.4505	0.0308	0	2.639	0.1041	0.1146	3.0549	0.1168	0.7933
Urosphena squameiceps	0.927	0.188	51.1868	6.7161	0.5907	1.0004	2.5594	1.9708	4.5382	0.8486	0.2589	2.2092	1.5872	4.7432	17.4174	4.1852	0.7327
Vanellus cinereus	0.9074	3.1916	8.7706	0.7883	1.1618	8.9749	0.9413	1.7731	4.7206	0.1966	42.9471	0.7943	0.043	0	19.9426	5.7542	0.6041
Vanellus vanellus	0.908	0.003	16.1282	1.0116	0.4482	1.3108	0.0581	1.3913	0.9722	3.583	38.0163	0.8304	0.0344	8.1882	17.8977	10.1264	0.4222
Xenus cinereus	0.9492	1.3339	10.249	4.2423	2.5359	4.756	0.9002	0	6.2133	0.5141	15.8934	2.3371	1.9939	0.6515	19.4645	28.9148	0.3808
Yuhina castaniceps	0.9496	0.4632	2.6172	4.8449	0	3.4948	0.6792	0.5563	40.7551	0.3594	0.0441	25.5319	0.6925	8.1912	9.8872	1.883	0.5281
Zapornia akool	0.9146	7.151	23.1894	0.0029	0	8.3568	1.6211	0.8603	32.3444	0.0705	7.203	2.0842	0	0.2928	16.8066	0.017	0.4929
Zapornia fusca	0.988	0.9372	24.0692	0.2184	0	46.7851	0	0.0044	1.1854	0.686	6.1694	1.2786	0.8222	0	14.2987	3.5454	0.3417
Zapornia pusilla	0.9762	0	5.6423	0	3.8318	1.0376	0.1109	0	4.8436	4.0879	26.7724	2.105	1.1802	1.4466	48.4244	0.5173	0.3439
Zoothera aurea	0.9215	0.5932	30.8027	0.3044	0.1508	3.3362	4.187	1.9904	9.395	0.3884	0.8489	2.4741	2.6291	1.2946	39.3665	2.2386	0.6436
Zosterops erythropleurus	0.9257	0.3919	12.044	5.5087	0.0269	2.5735	5.4968	0.1874	14.0494	0.5839	0.173	5.357	2.9754	4.0344	32.5906	14.007	0.5592
Zosterops japonicus	0.7241	4.4432	22.3403	0.2014	3.9667	0.4762	1.0761	22.6405	22.3694	0.9983	1.3882	4.3012	1.7203	0.7032	10.553	2.8218	0.3845
